# Supplementary material for: NEAT1 promotes the malignant development of bladder cancer by regulating the miR-101/VEGF-C pathway in vitro and in vivo
Source: PubMed Central journal article supplement (PMC9700885; doi:10.1186/s12894-022-01151-z), 2022-11-25

Supplementary Fig S1

Original western blots for Figure 1G

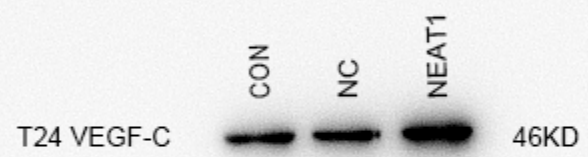

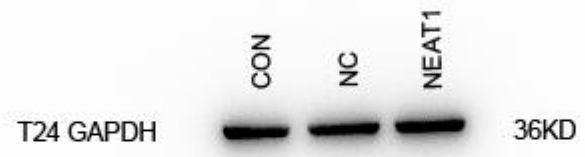

T24 VEGF-C

| Group | VEGF-C Expression (46KD) |
|-------|--------------------------|
| CON   | Low                      |
| NC    | Medium                   |
| NEAT1 | High                     |

46KD

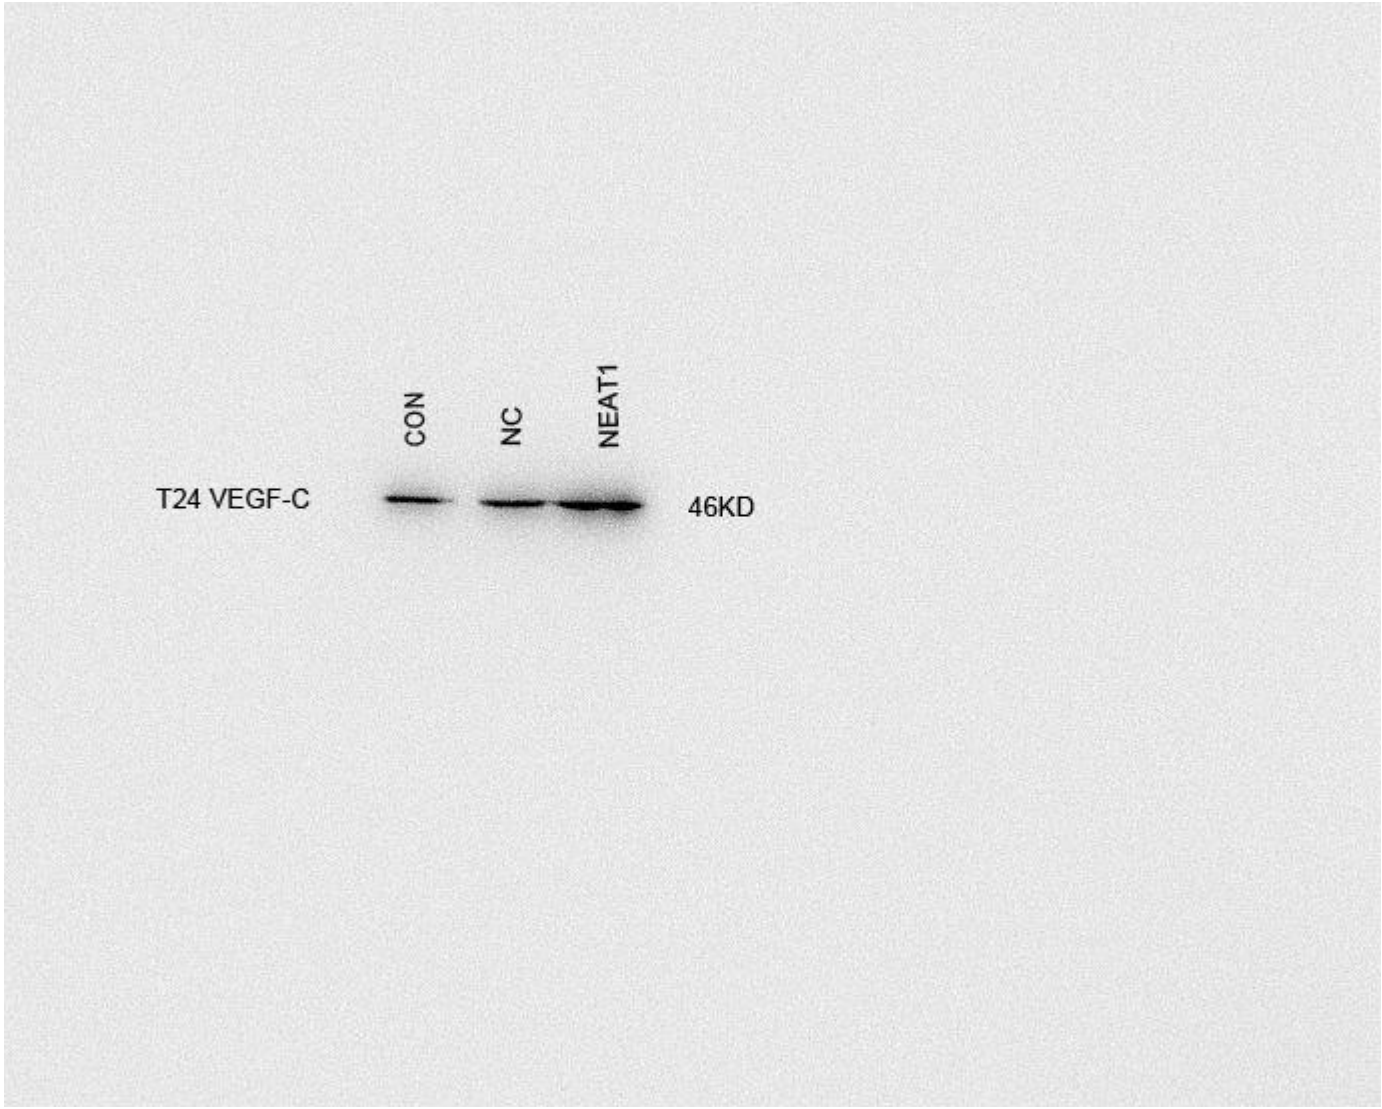

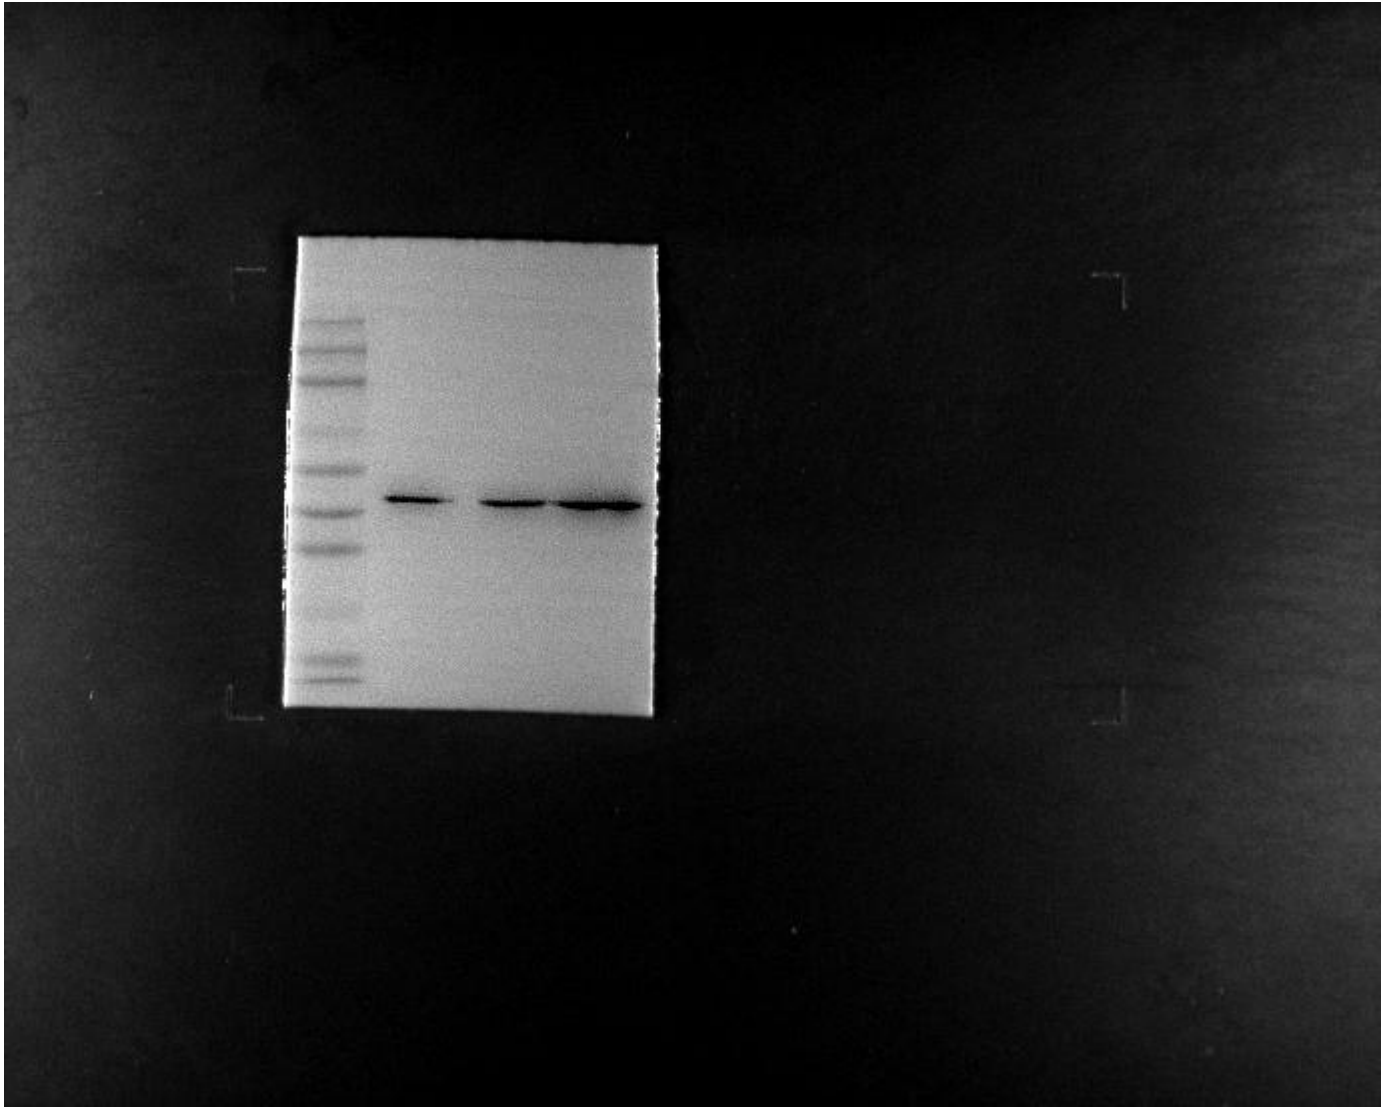

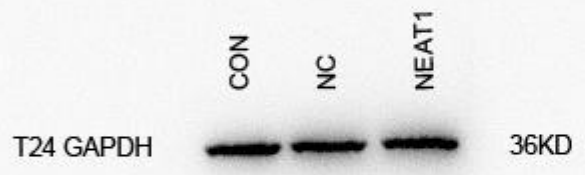

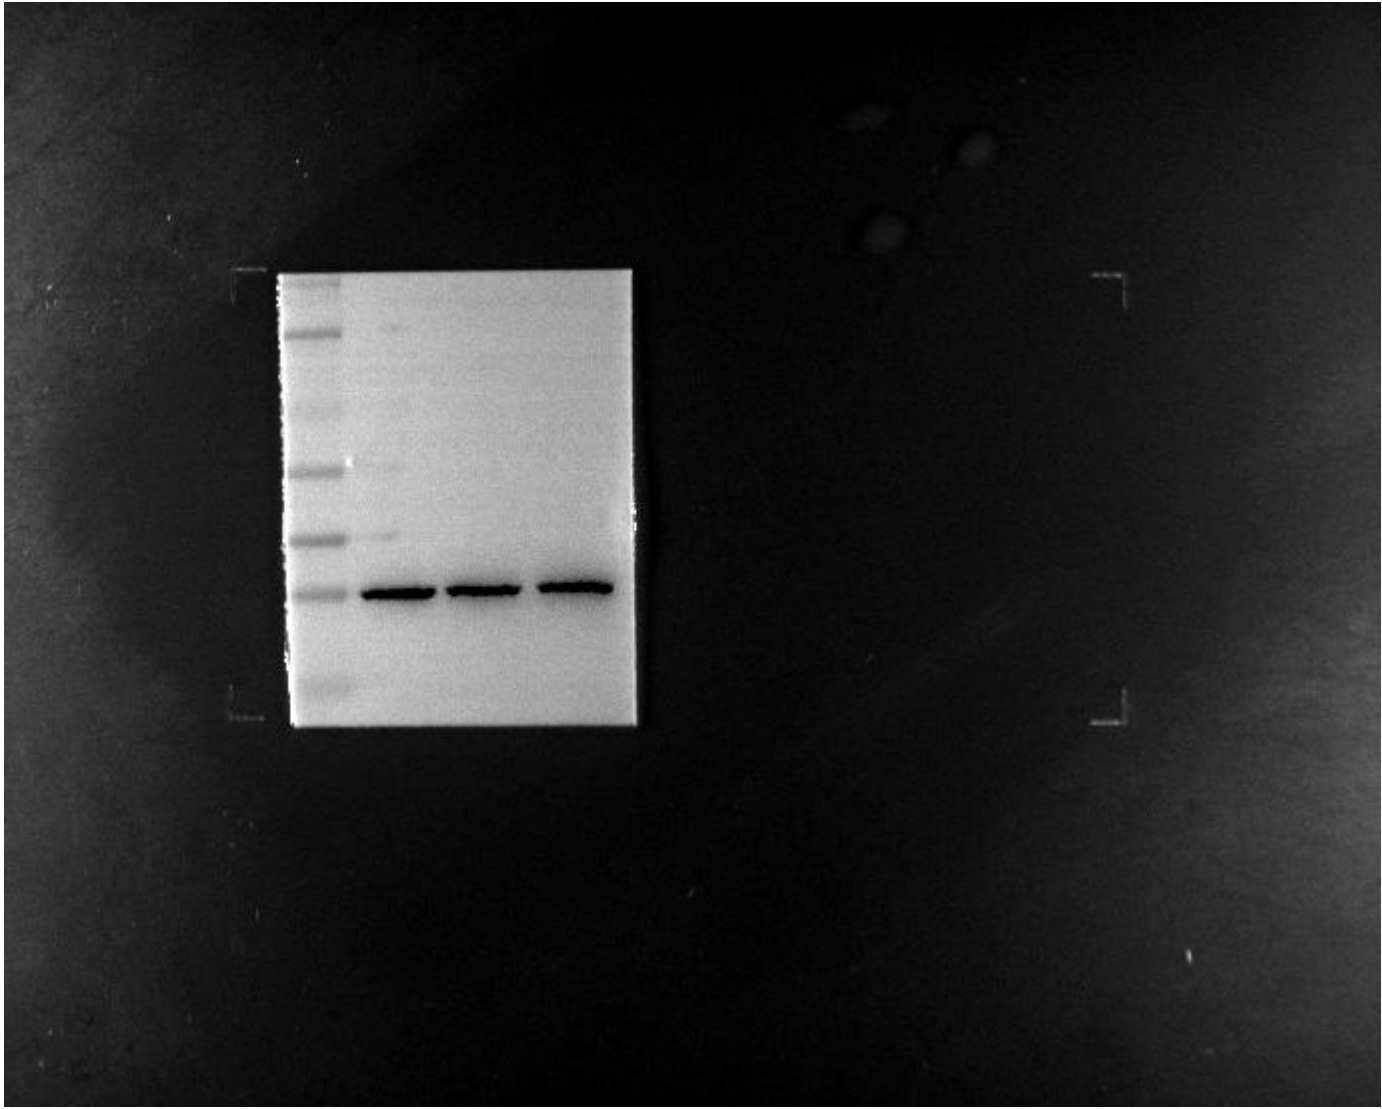

T24 VEGF-C

| CON  | NC   | NEAT1 |
|------|------|-------|
| 46KD | 46KD | 46KD  |

46KD

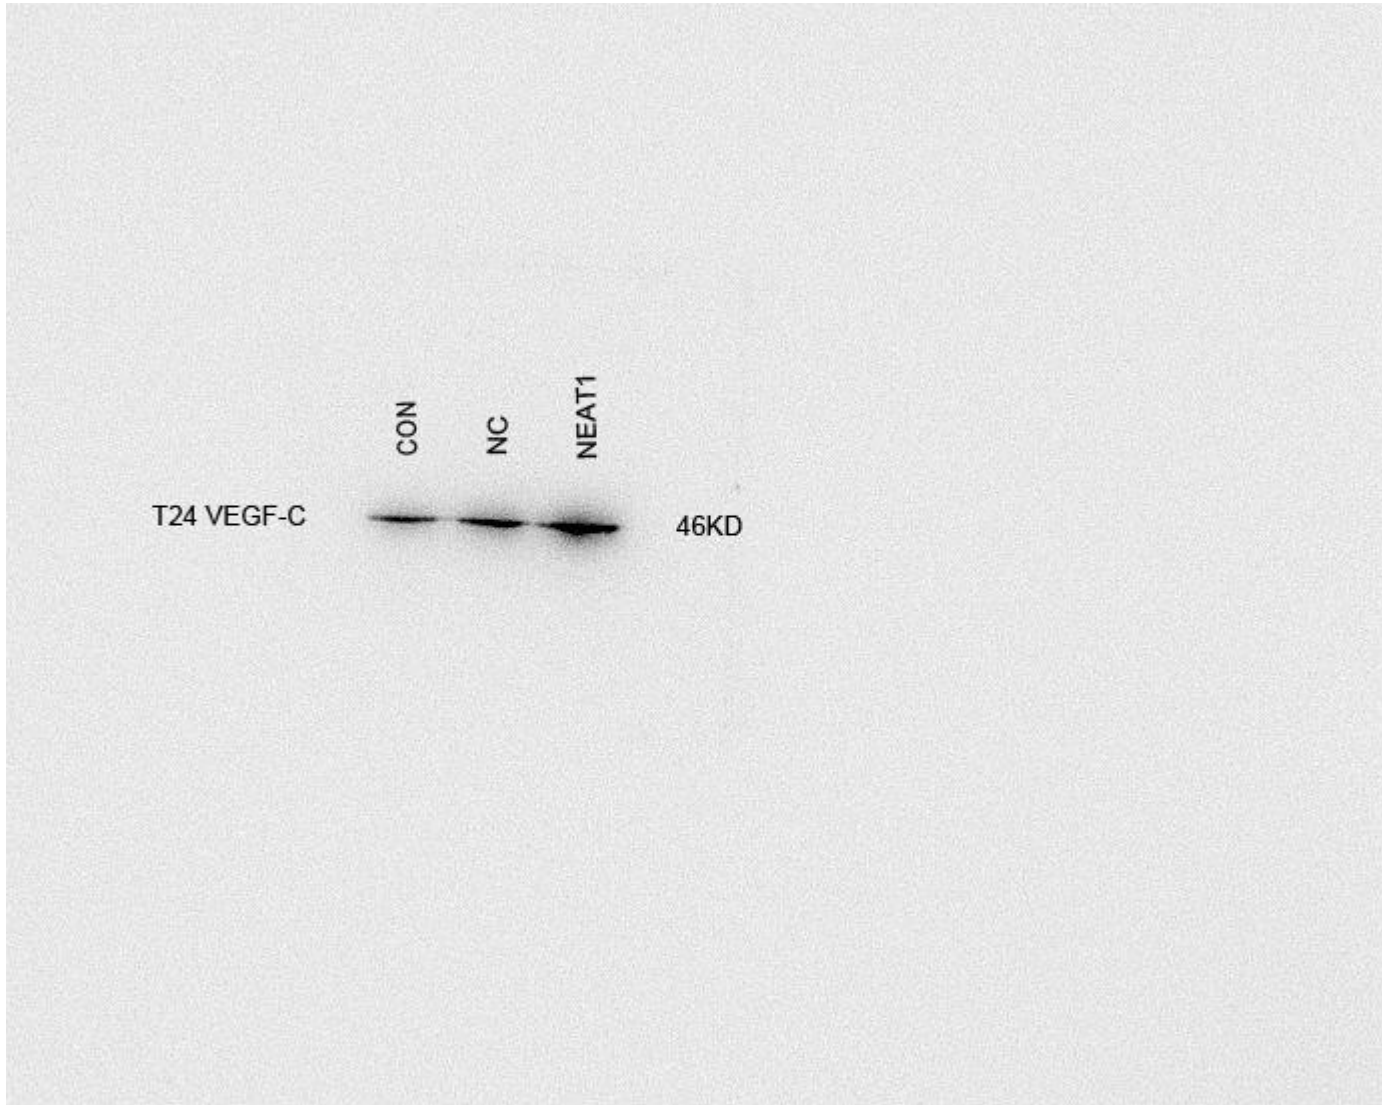

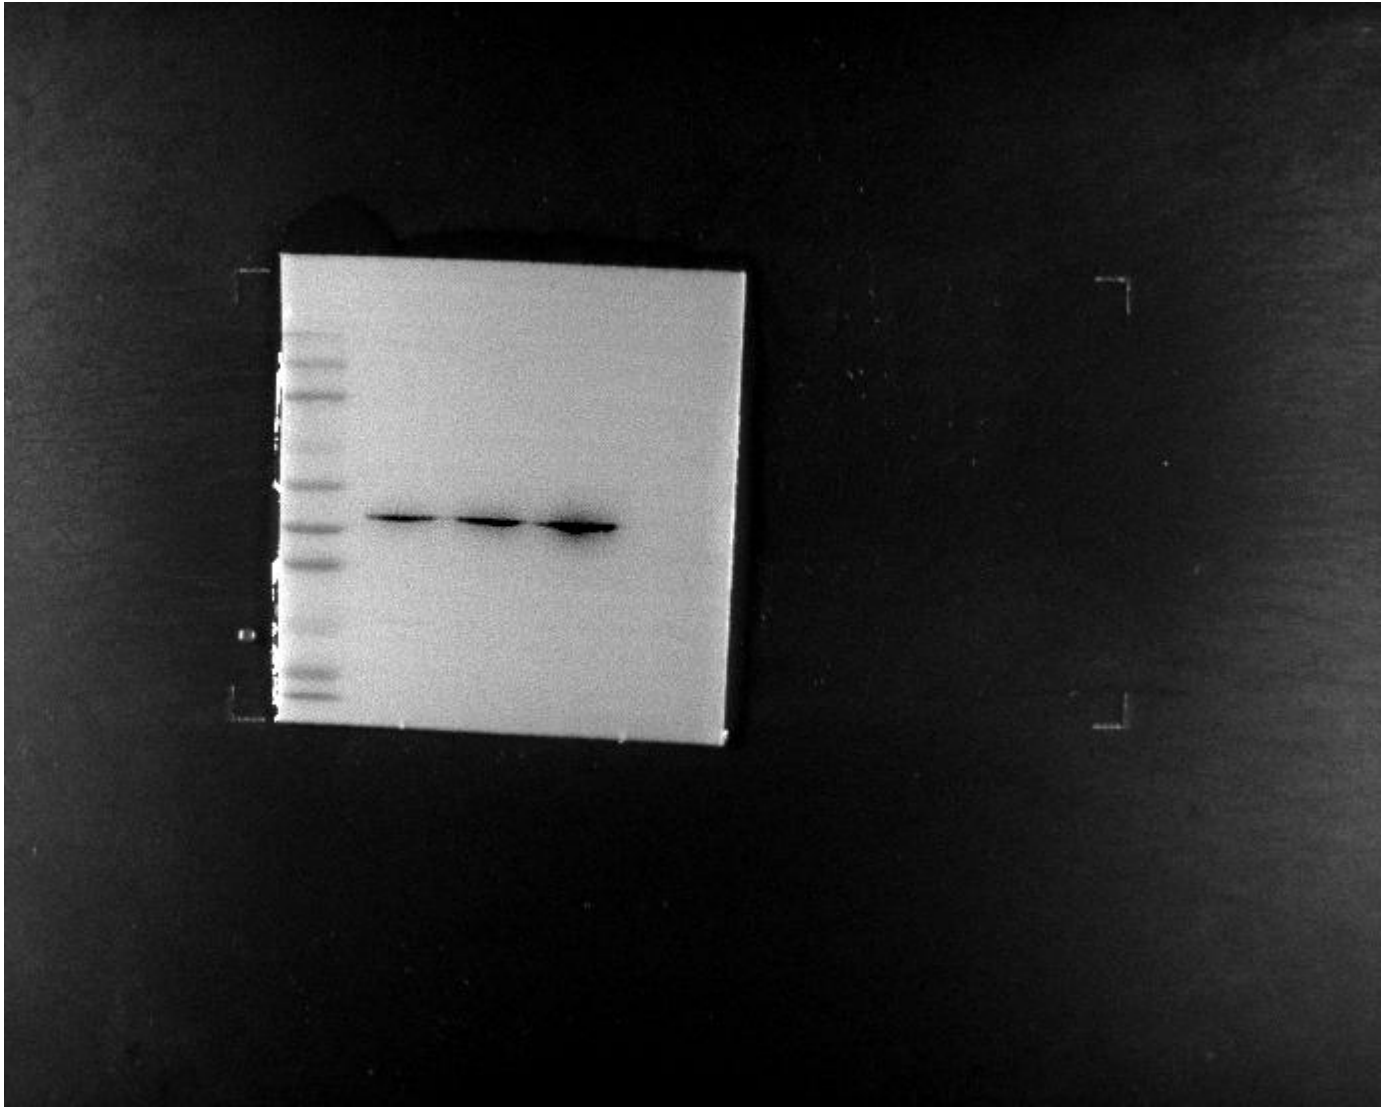



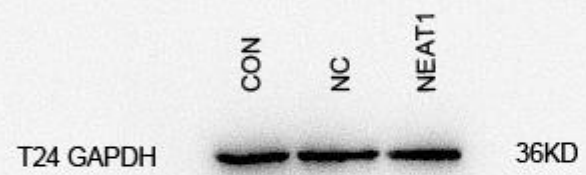

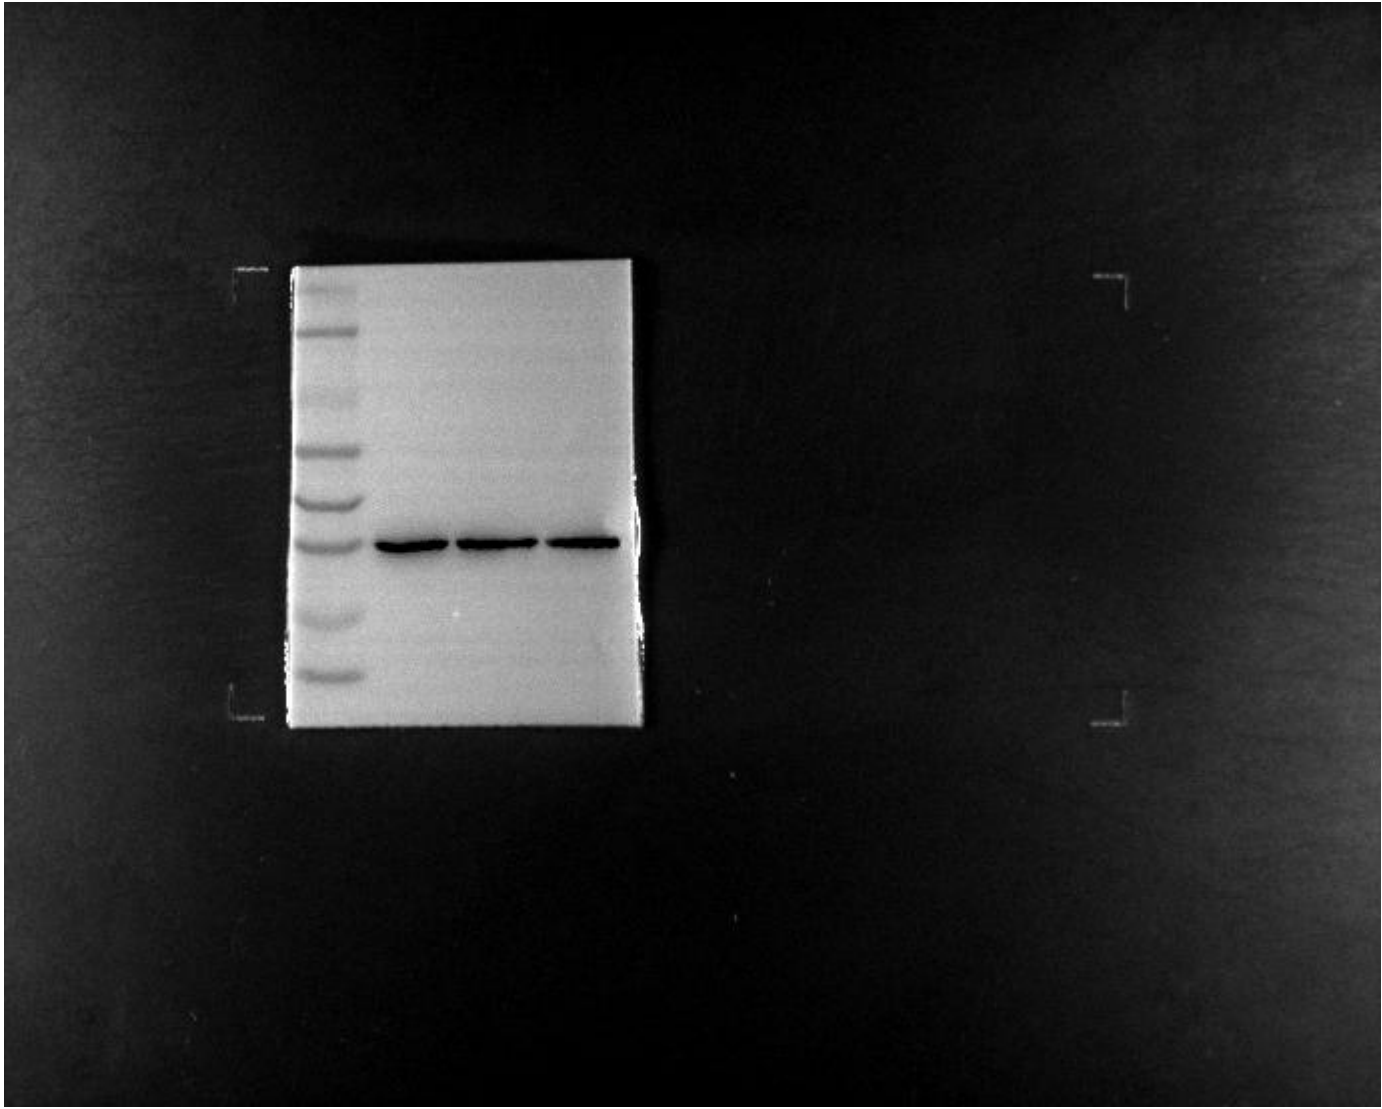

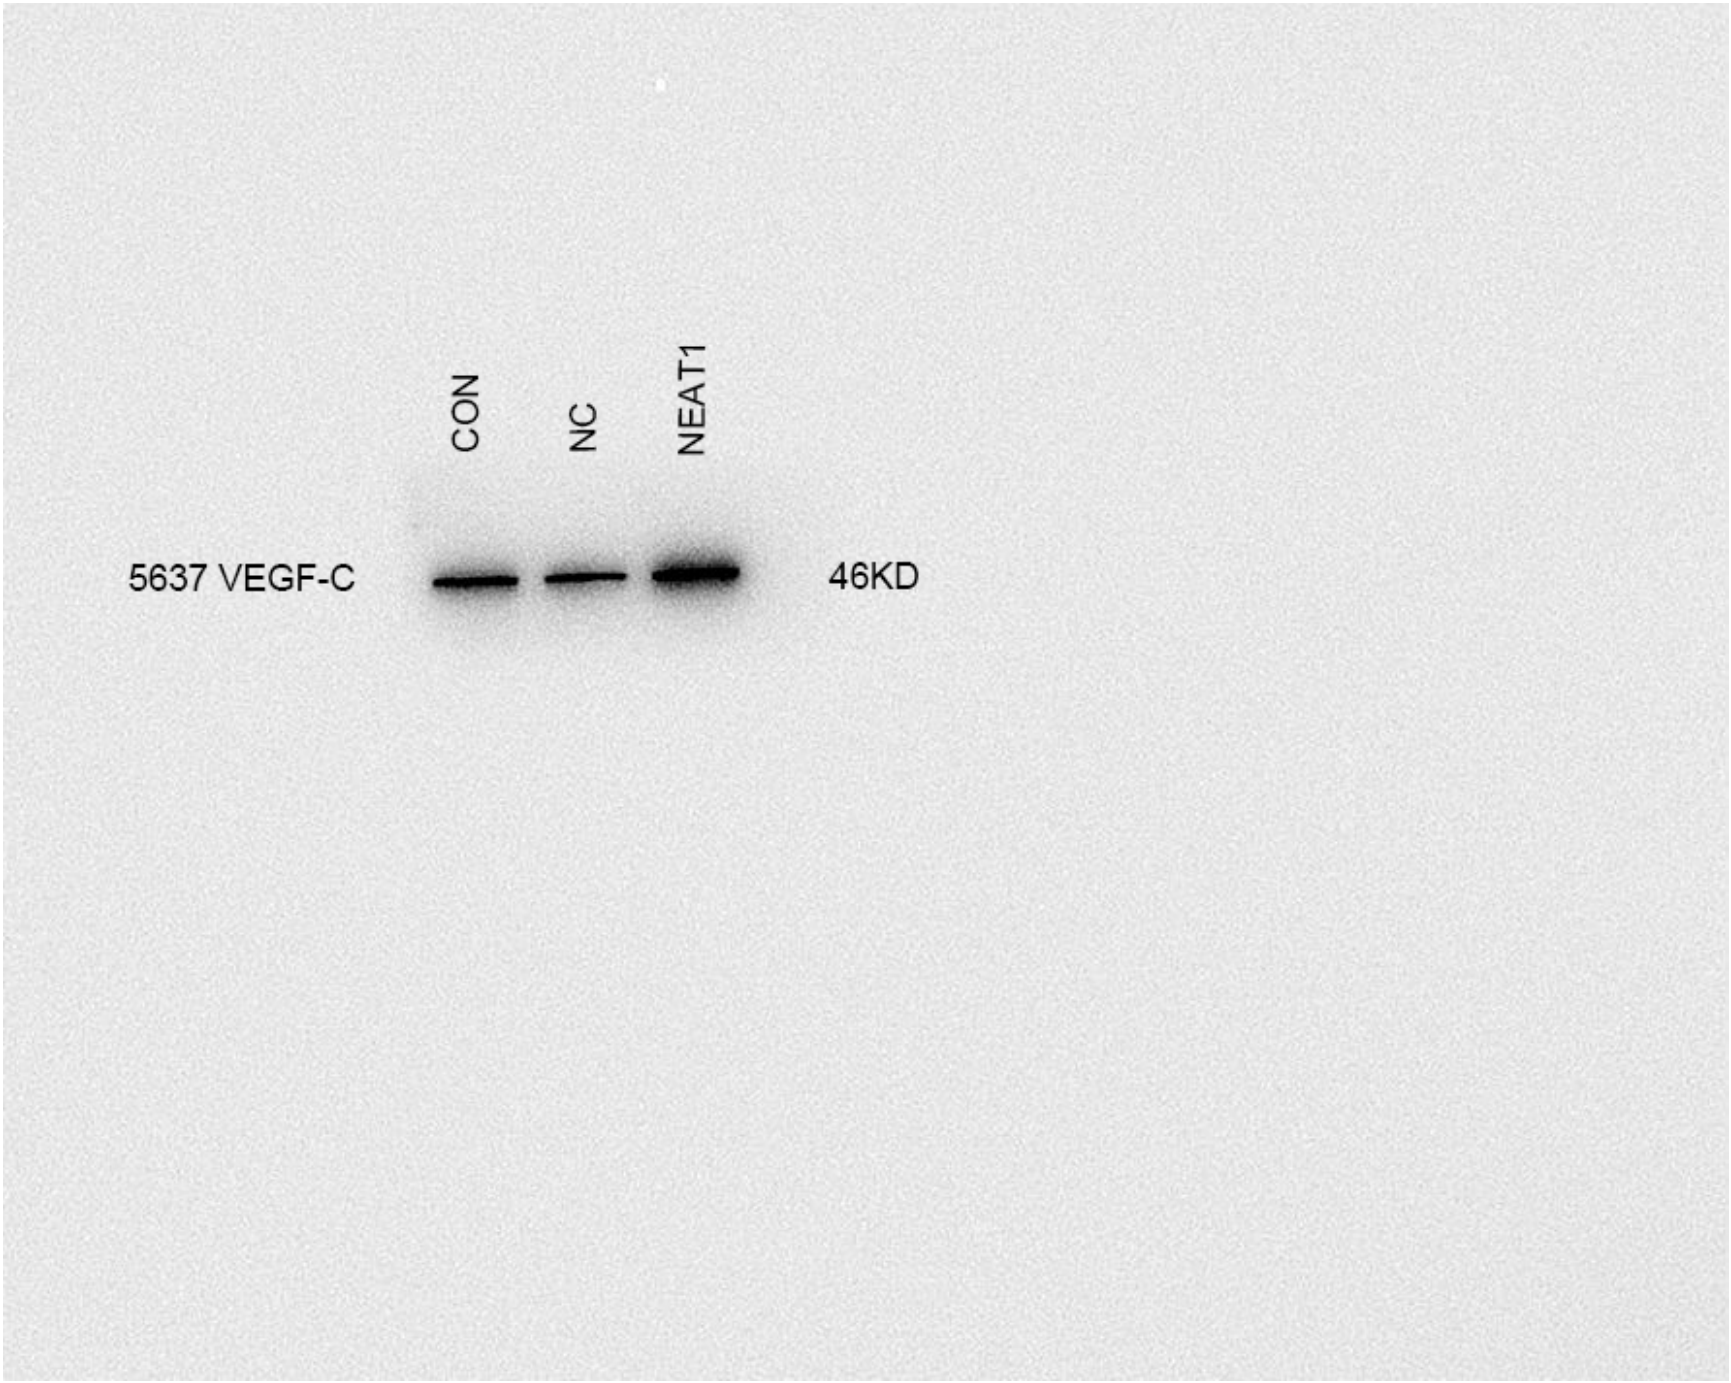

5637 VEGF-C

CON

NC

NEAT1

46KD

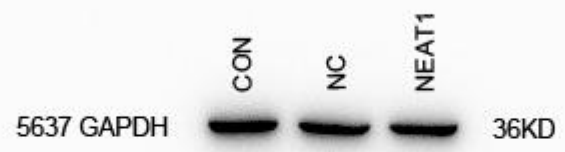

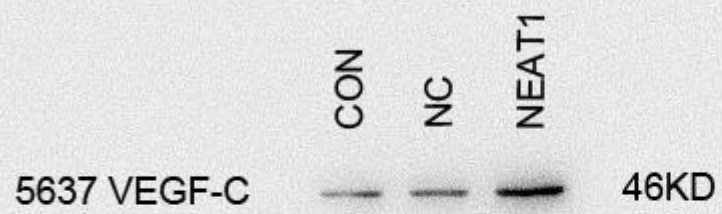

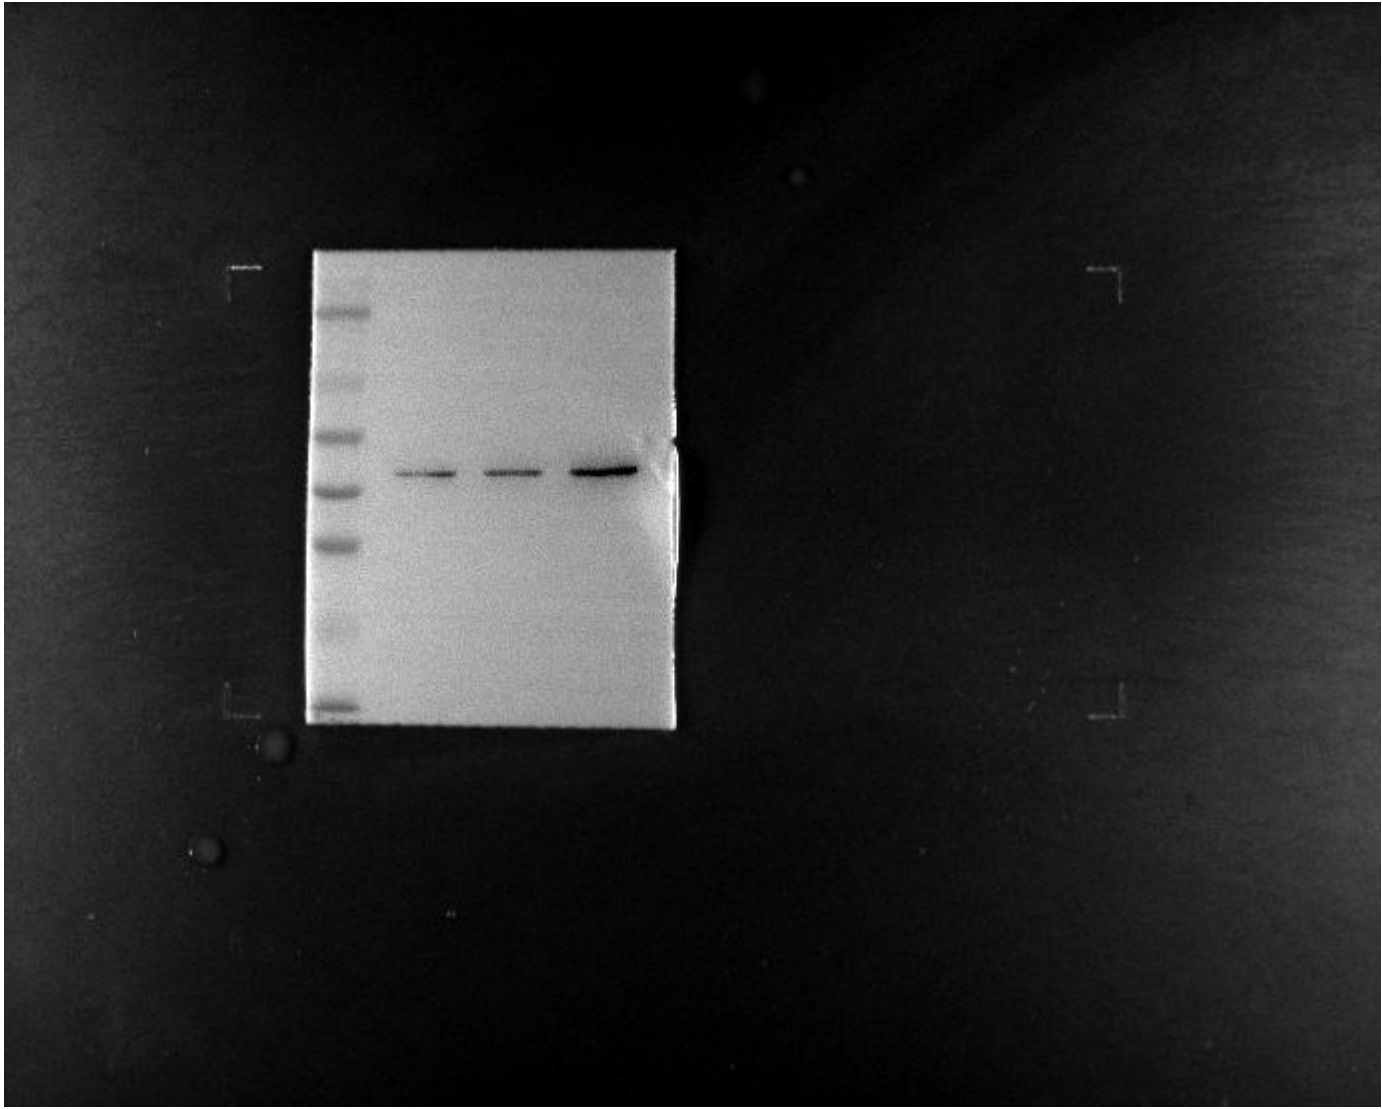

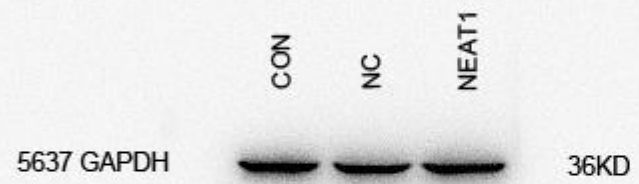

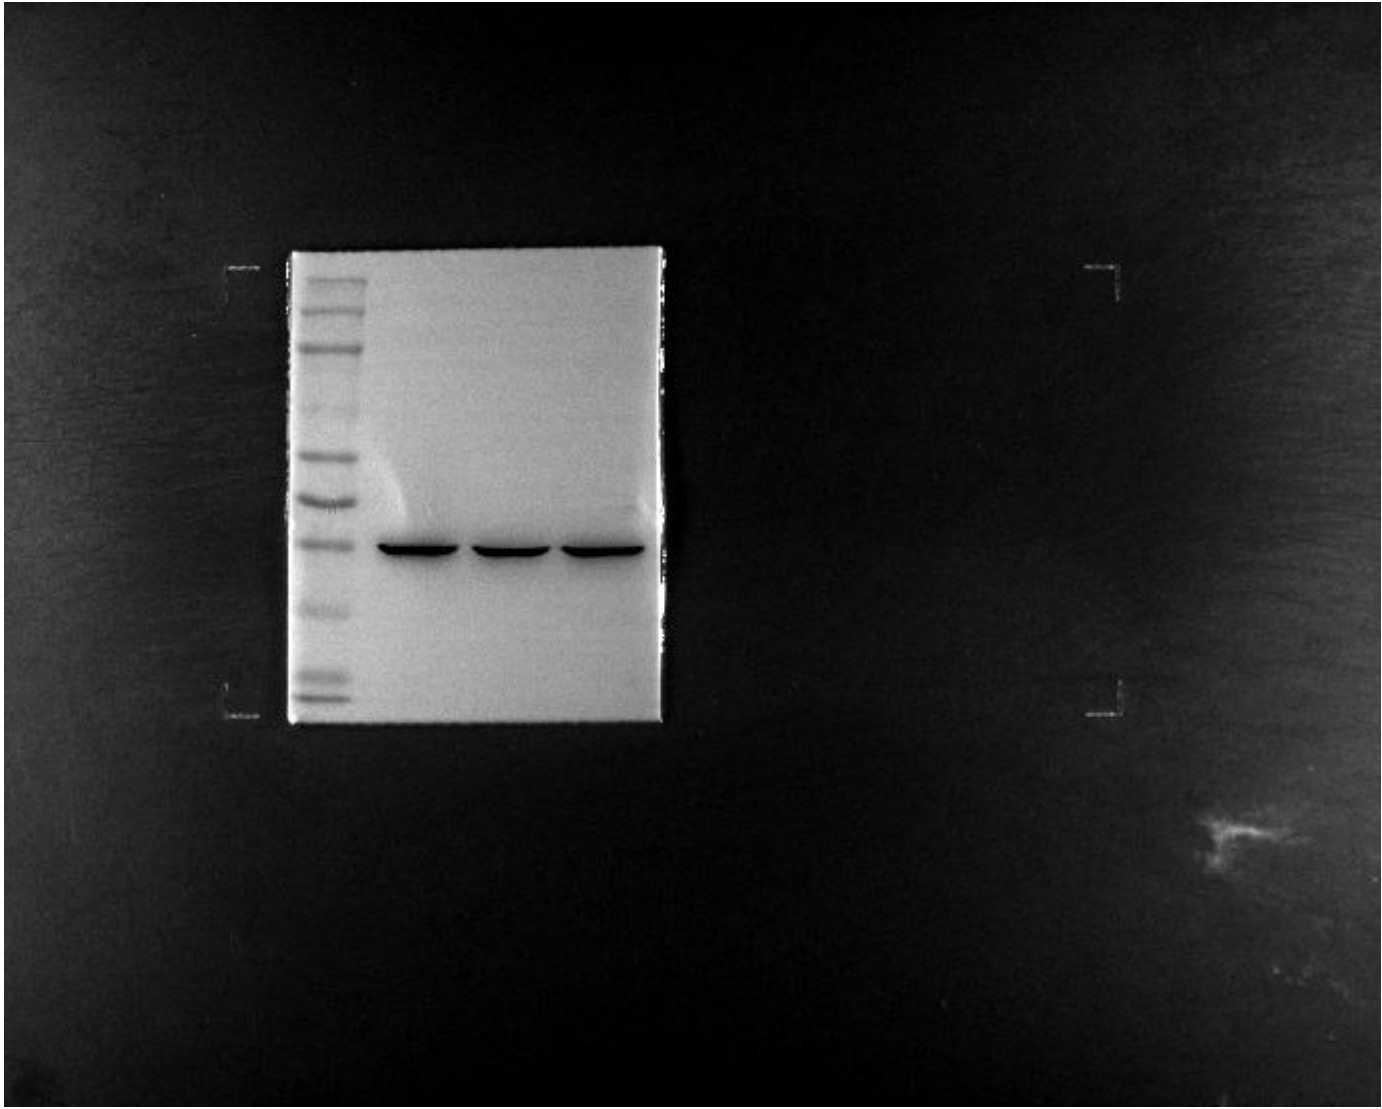



5637 VEGF-C 46KD

| Group | VEGF-C (46KD) |
|-------|---------------|
| CON   | Weak band     |
| NC    | Weak band     |
| NEAT1 | Strong band   |

CON

NC

NEAT1

46KD

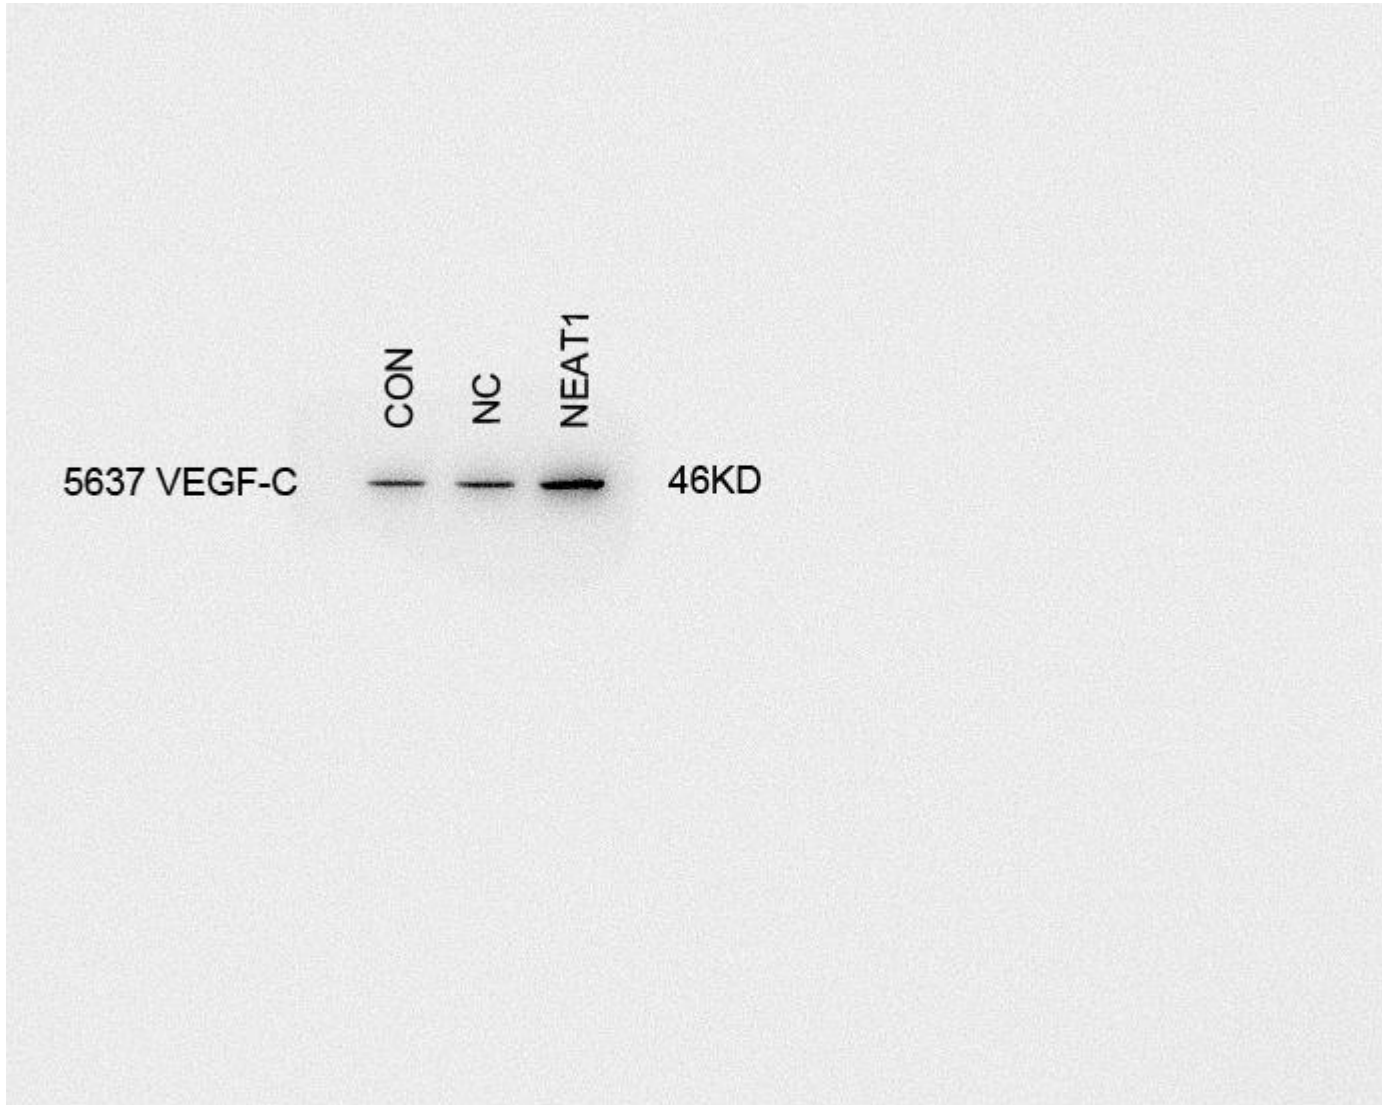

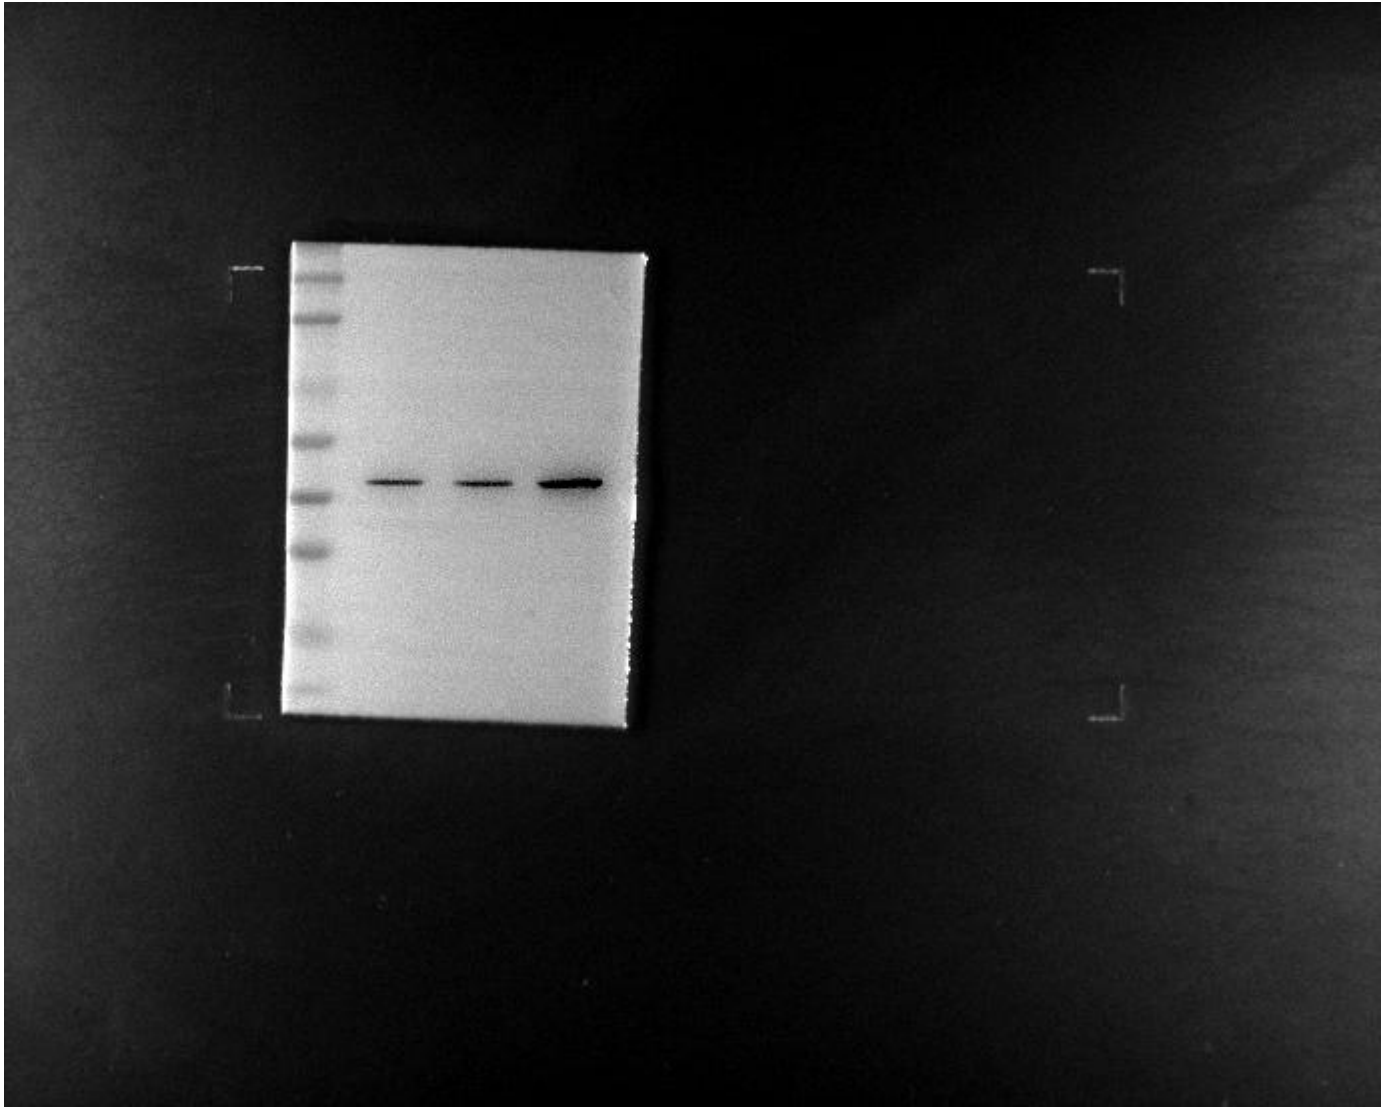

5637 GAPDH

| CON                                                                               | NC                                                                                | NEAT1                                                                              |
|-----------------------------------------------------------------------------------|-----------------------------------------------------------------------------------|------------------------------------------------------------------------------------|
|  |  |  |

36KD

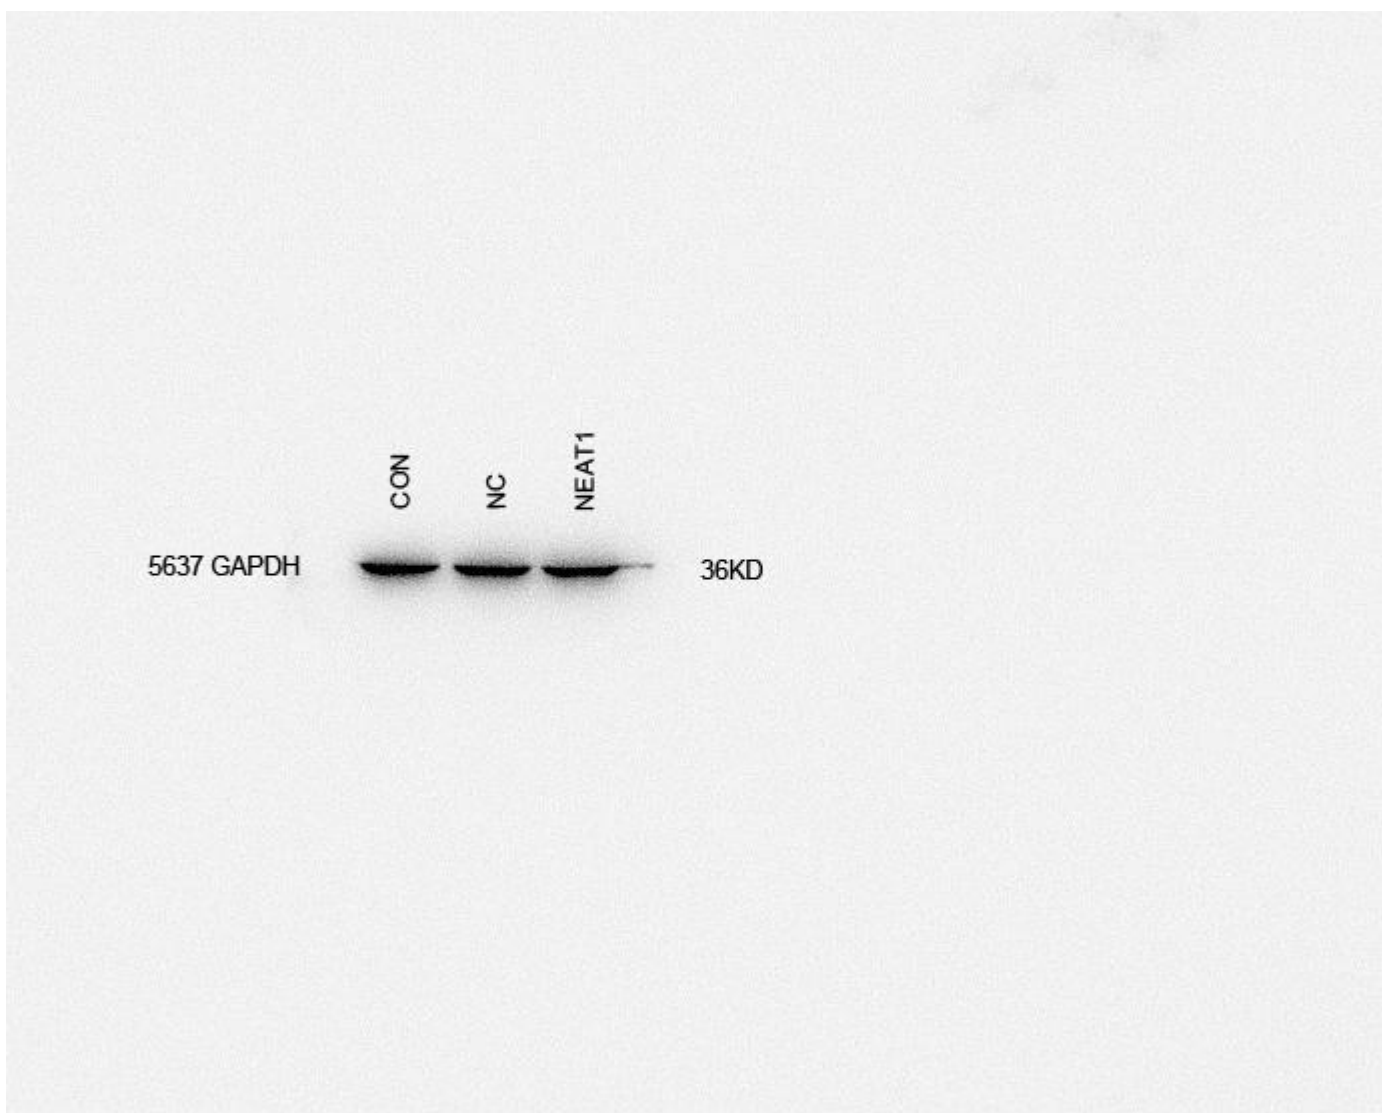

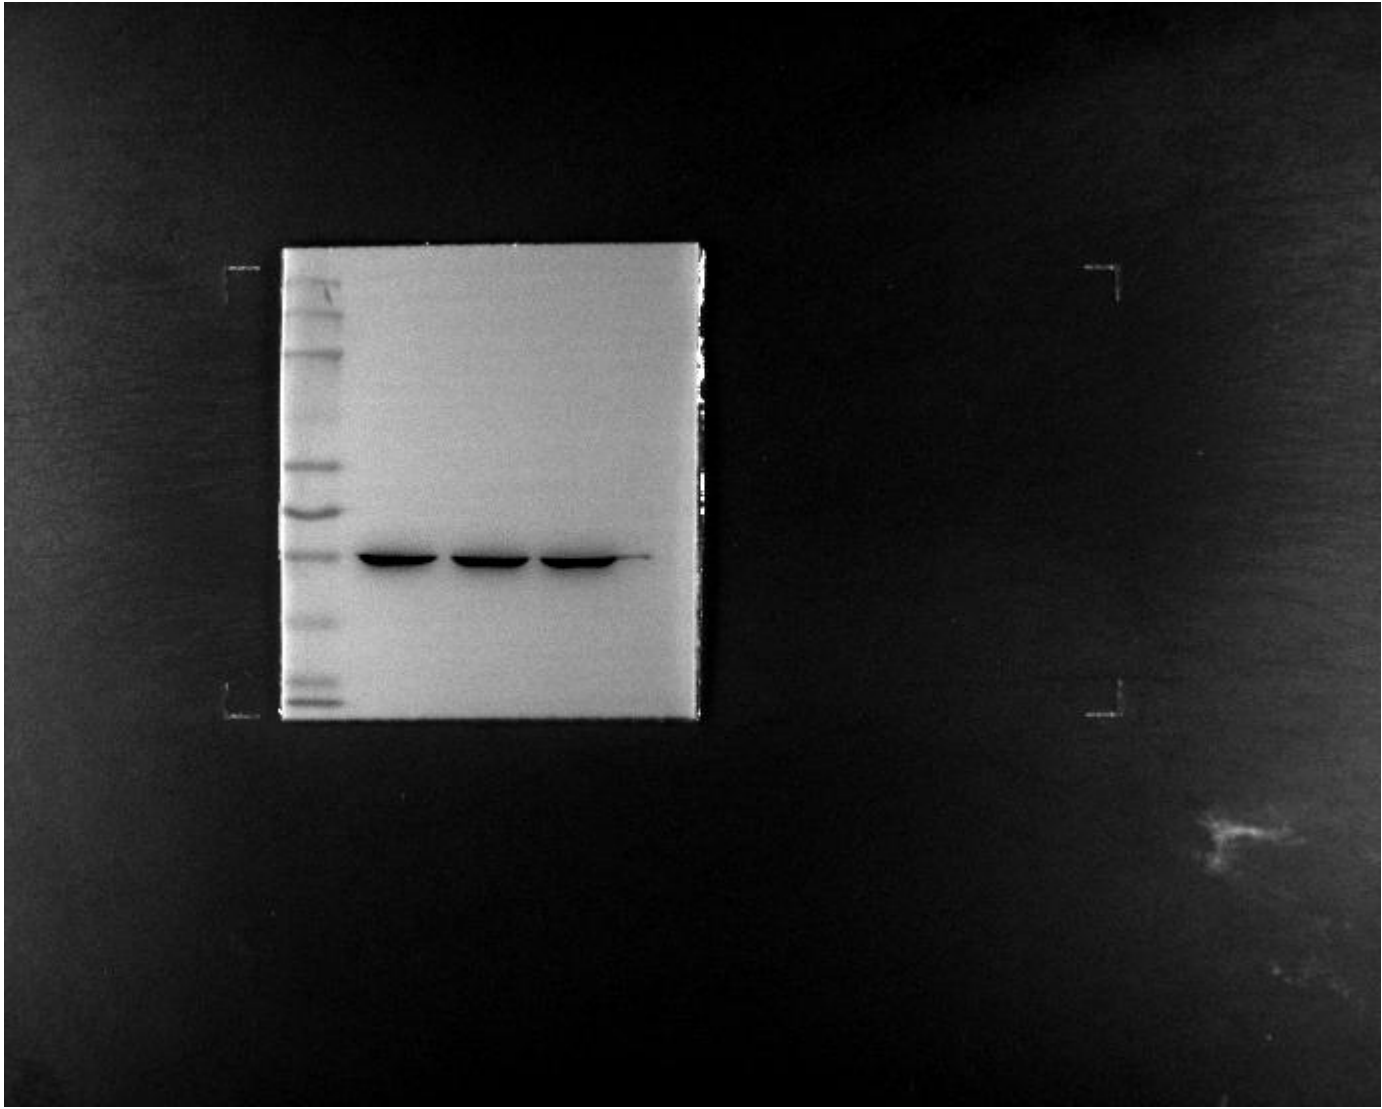

Supplement: 12894_2022_1151_MOESM1_ESM.pdf [file 12894_2022_1151_MOESM1_ESM.pdf]
