# Supplementary material for: NEAT1 promotes the malignant development of bladder cancer by regulating the miR-101/VEGF-C pathway in vitro and in vivo
Source: PubMed Central journal article supplement (PMC9700885; doi:10.1186/s12894-022-01151-z), 2022-11-25

Supplementary Fig S2

Original western blots for Figure 2F

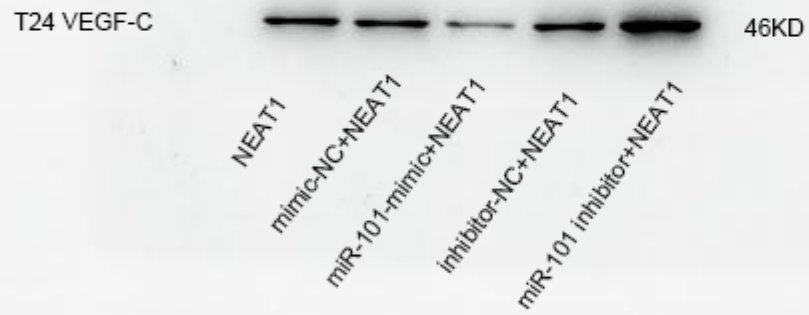

T24 GAPDH

36KD

NEAT1  
mimic-NC+NEAT1  
miR-101 mimic+NEAT1  
inhibitor-NC+NEAT1  
miR-101 inhibitor+NEAT1

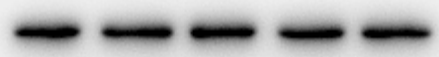

T24 VEGF-C

46KD

NEAT1

mimic-NC+NEAT1

miR-101-mimic+NEAT1

inhibitor-NC+NEAT1

miR-101 inhibitor+NEAT1

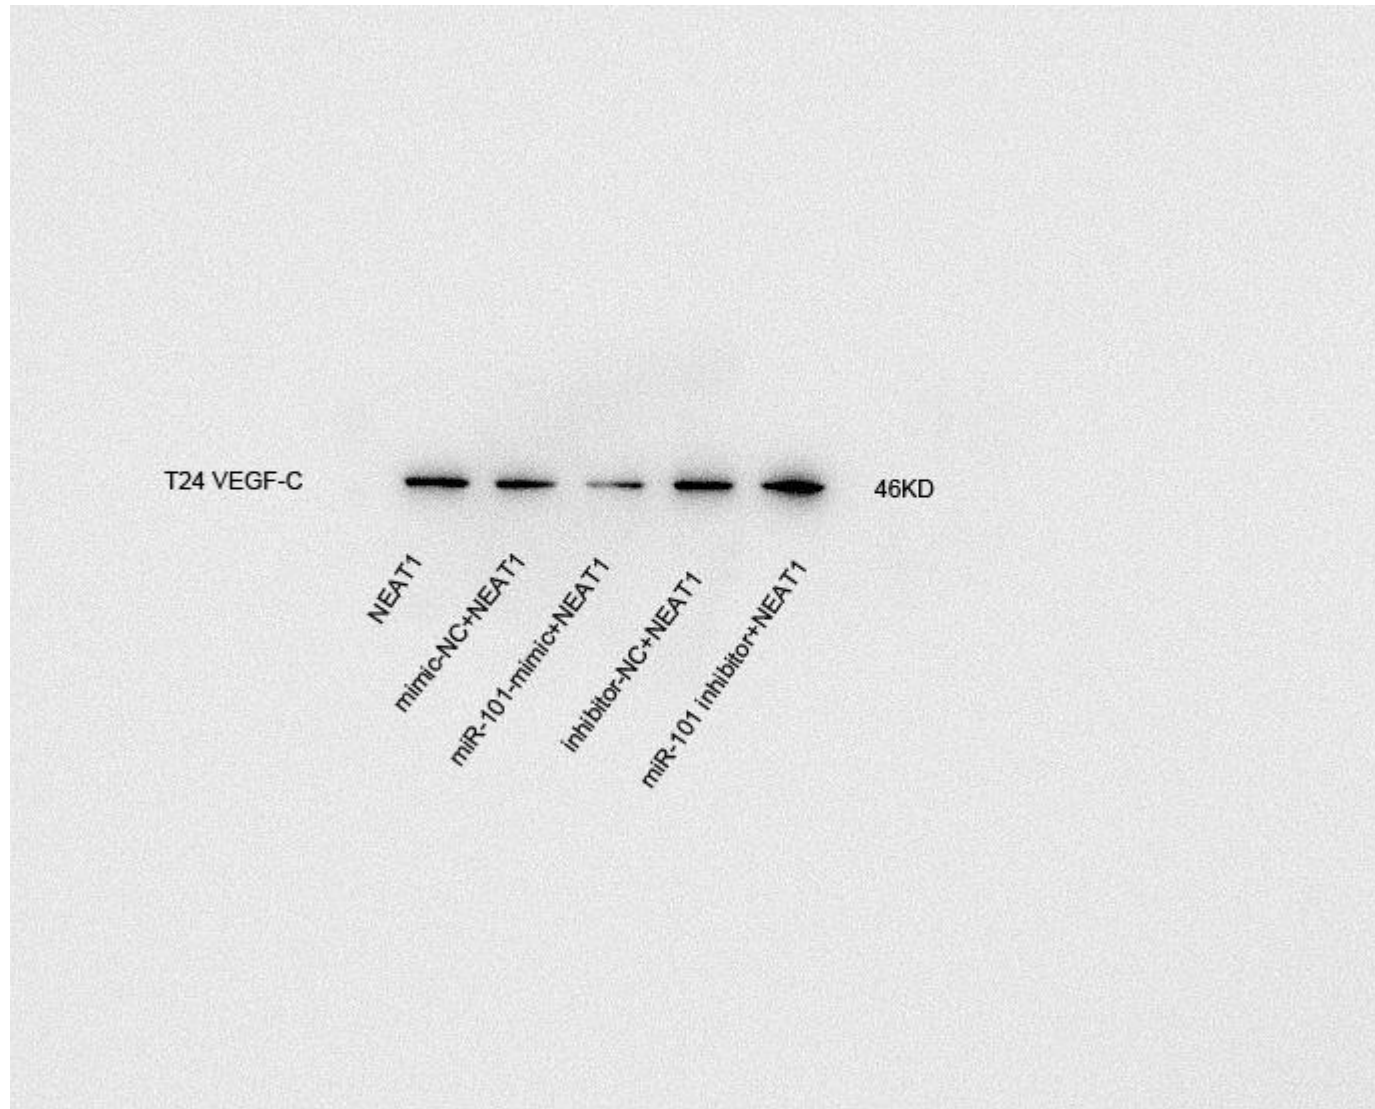

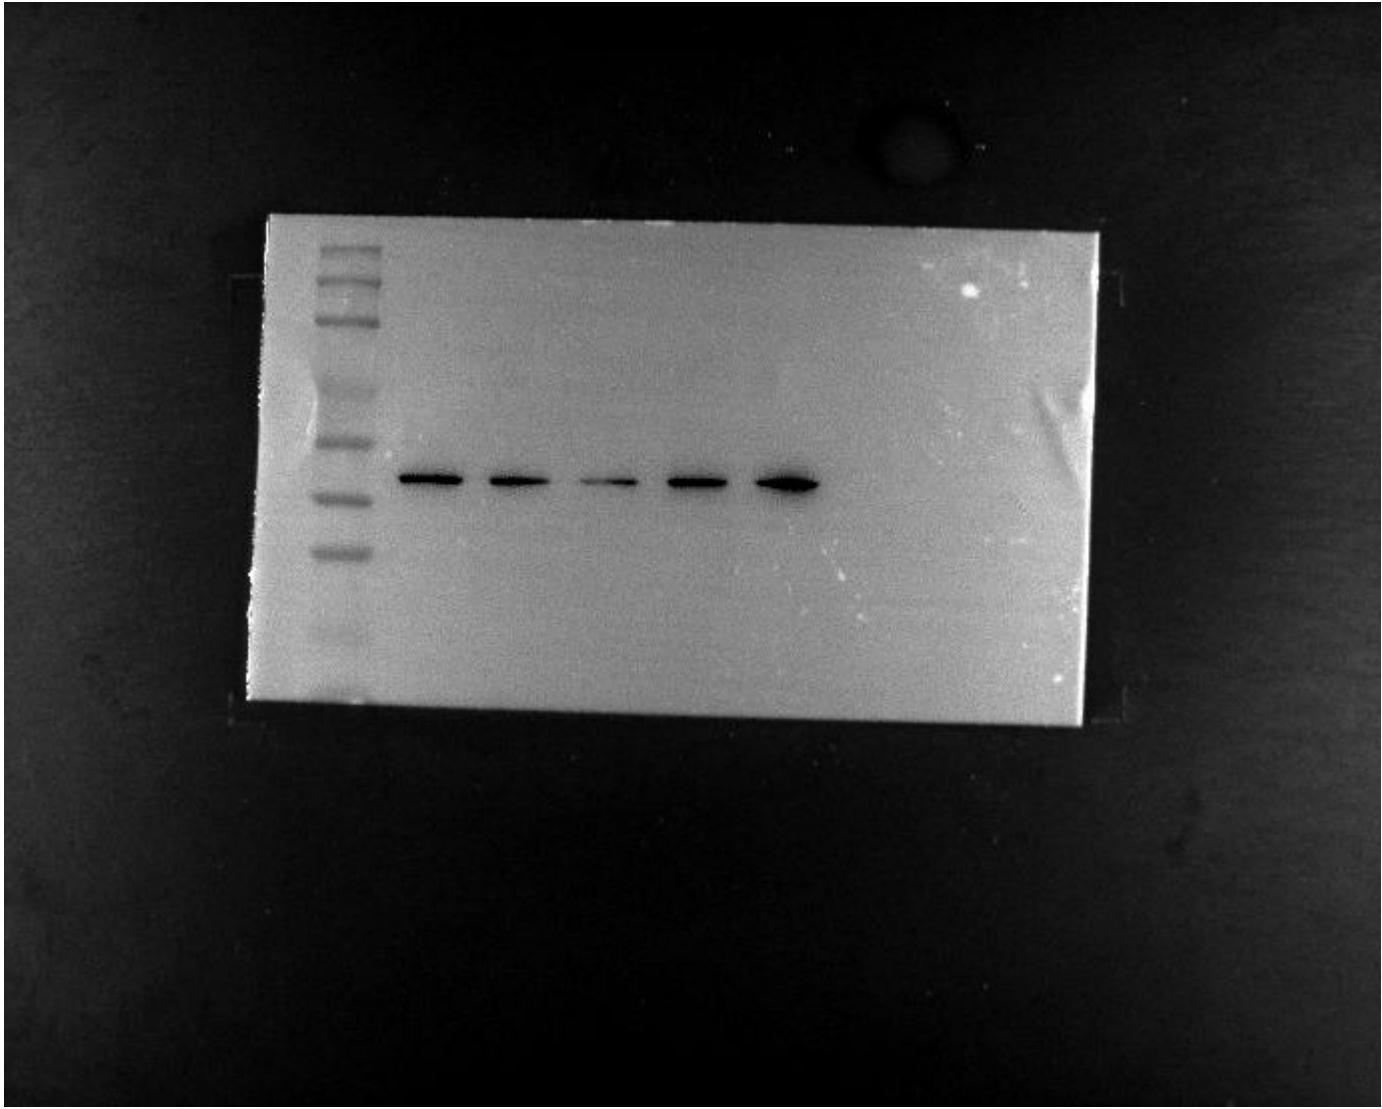

T24 GAPDH

NEAT1  
mimic-NC+NEAT1  
miR-101 mimic+NEAT1  
inhibitor-NC+NEAT1  
miR-101 inhibitor+NEAT1

36KD

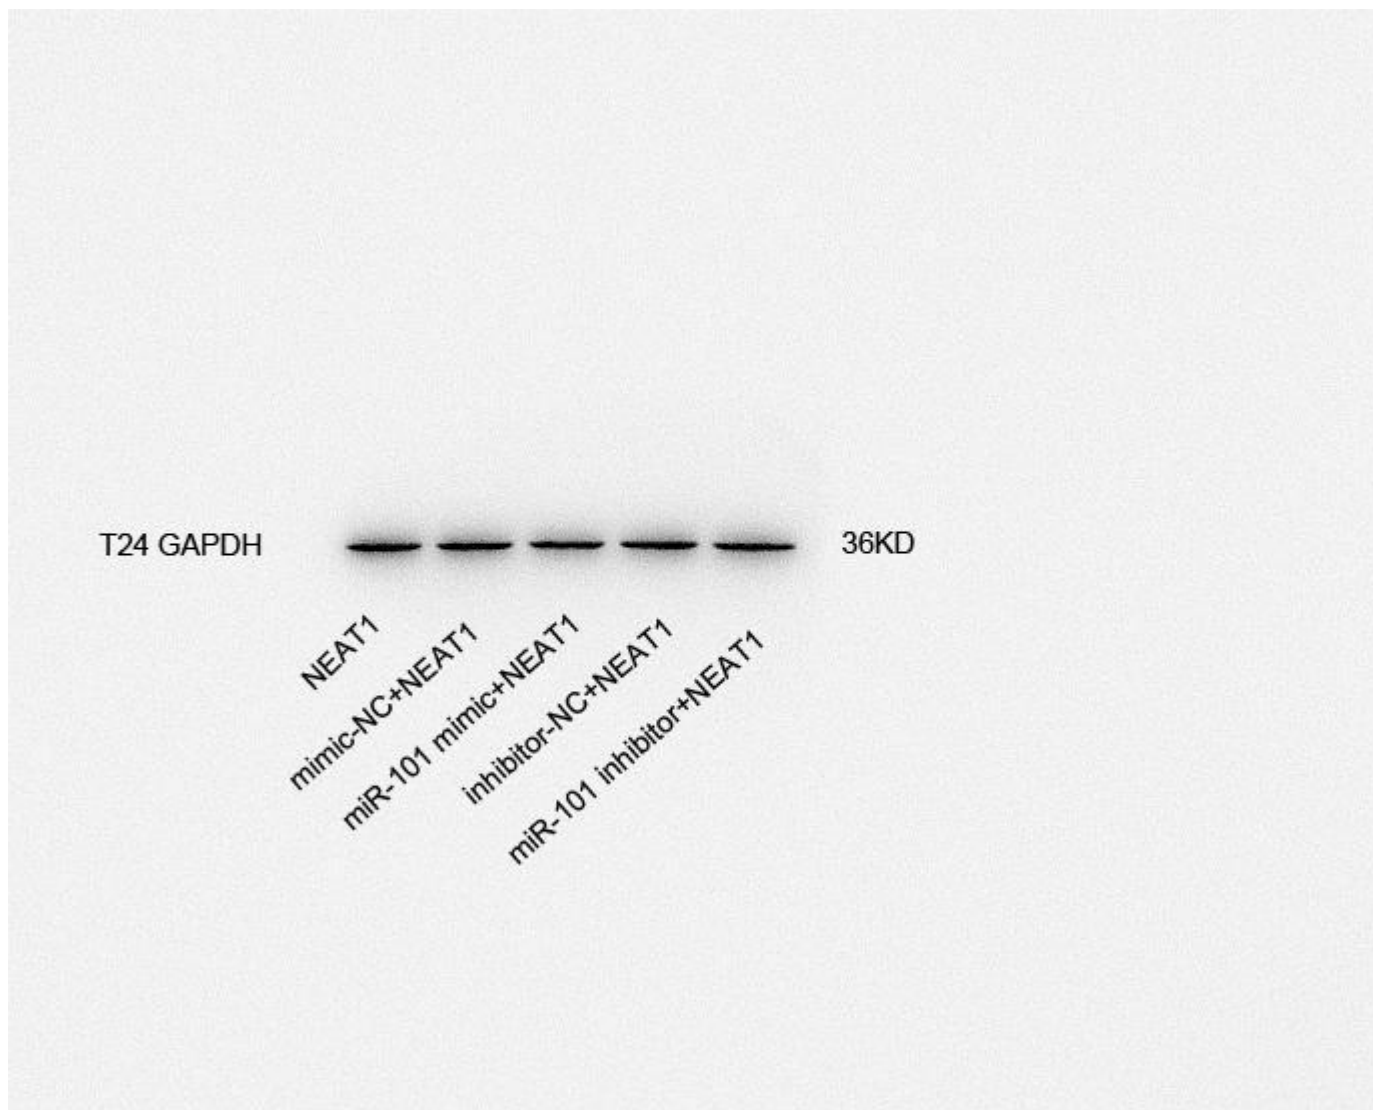

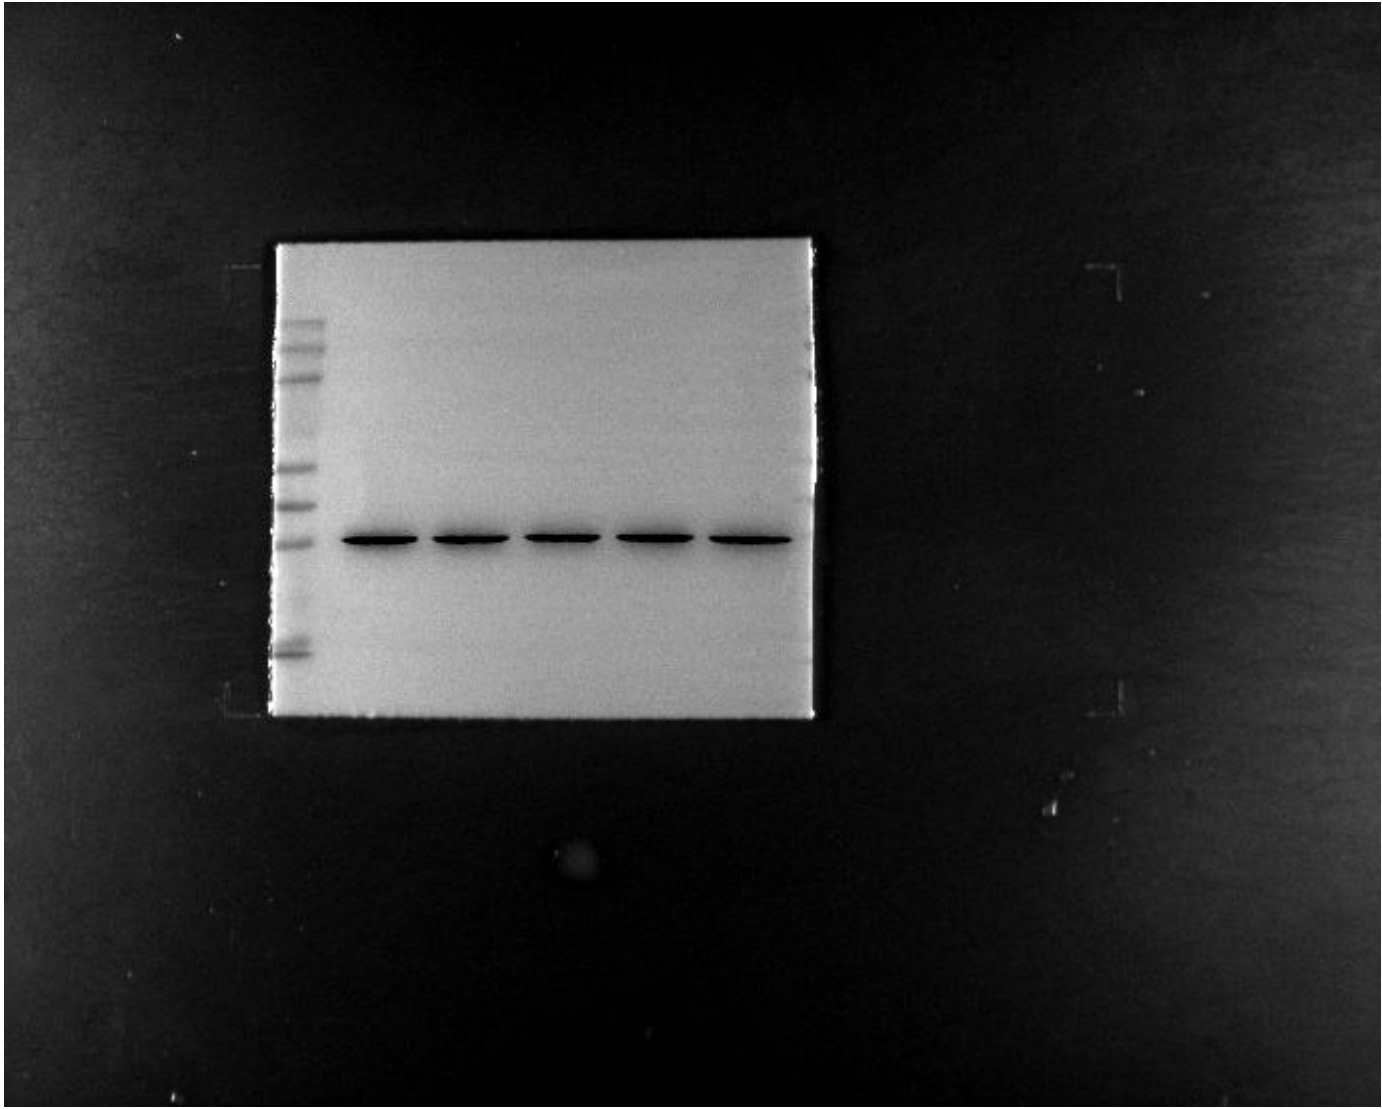

T24 VEGF-C

46KD

NEAT1

mimic-NC+NEAT1

miR-101-mimic+NEAT1

inhibitor-NC+NEAT1

miR-101 inhibitor+NEAT1

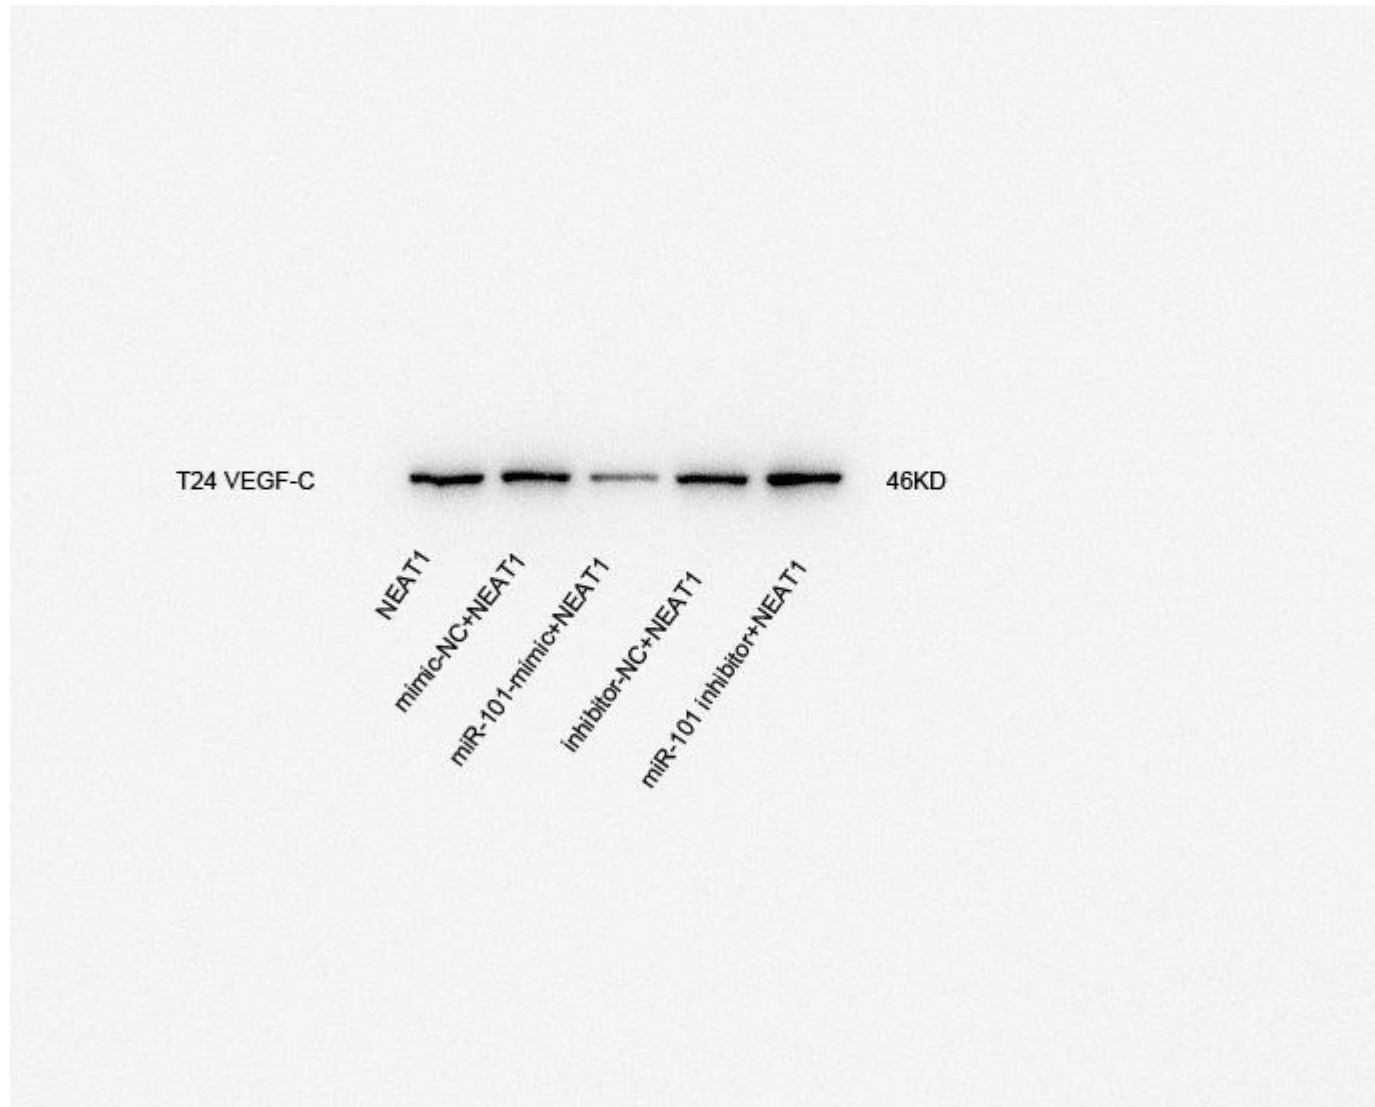

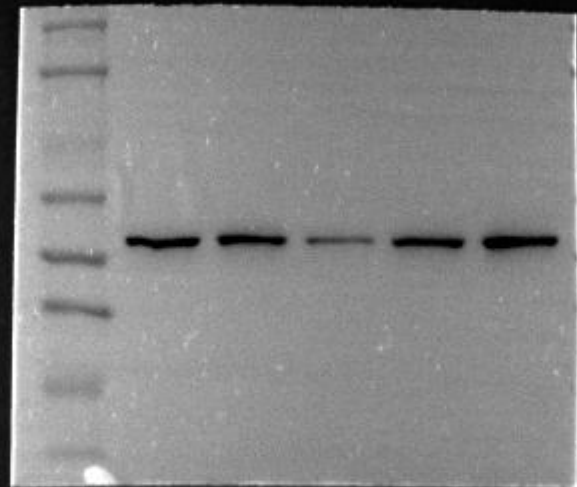



T24 GAPDH

NEAT1  
mimic-NC+NEAT1  
miR-101 mimic+NEAT1  
inhibitor-NC+NEAT1  
miR-101 inhibitor+NEAT1

36KD

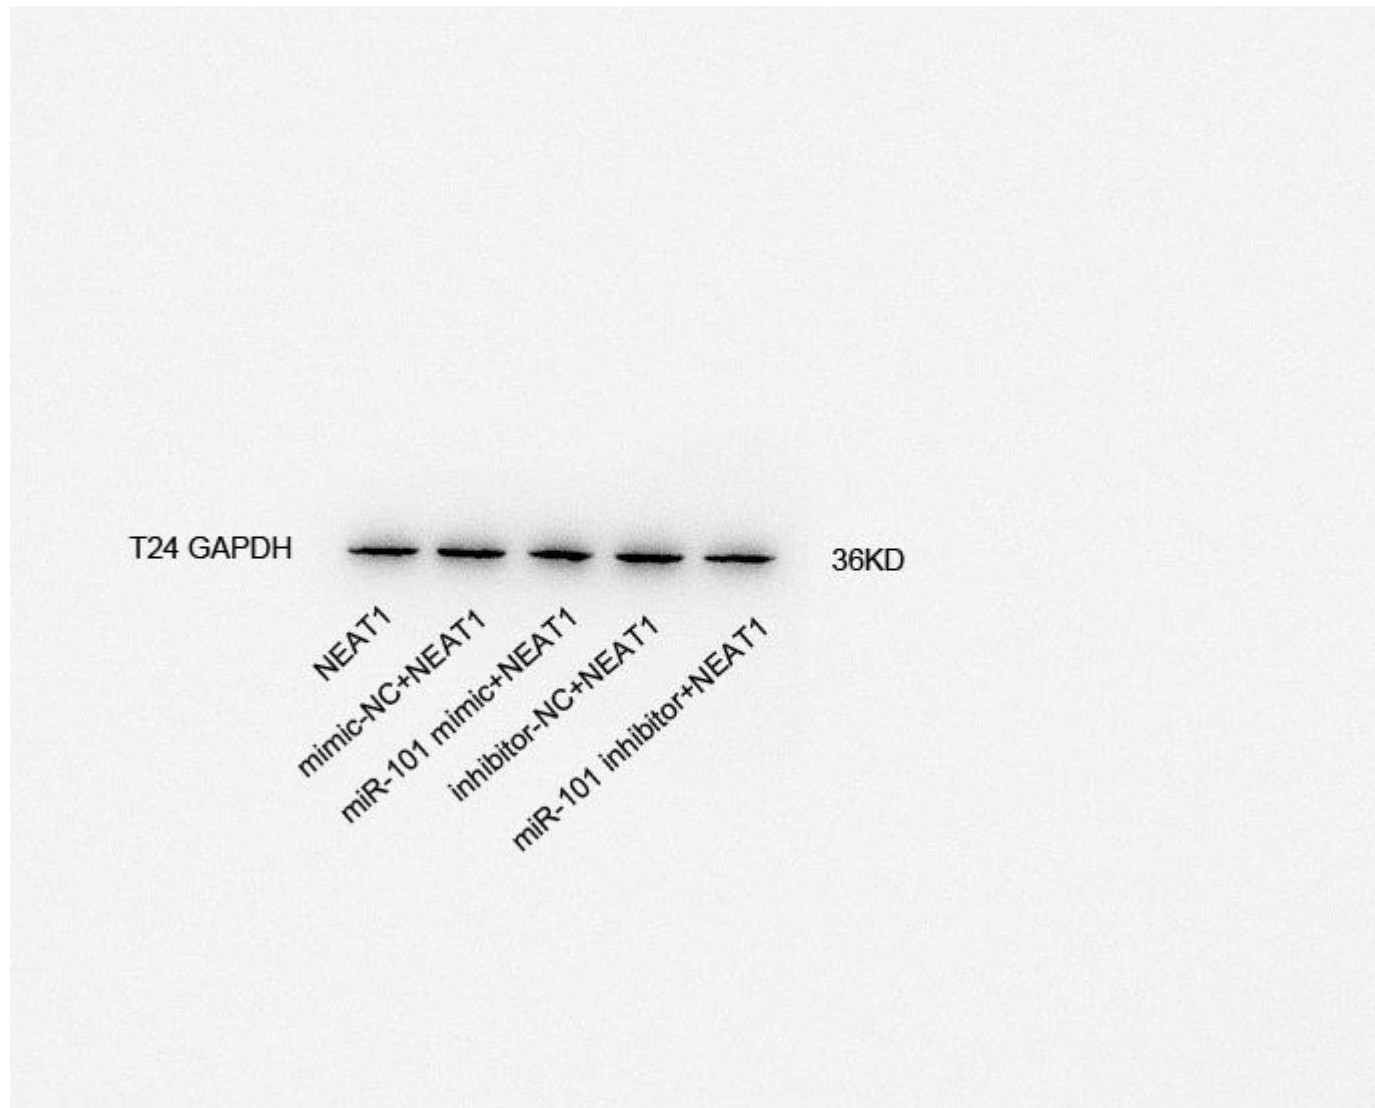

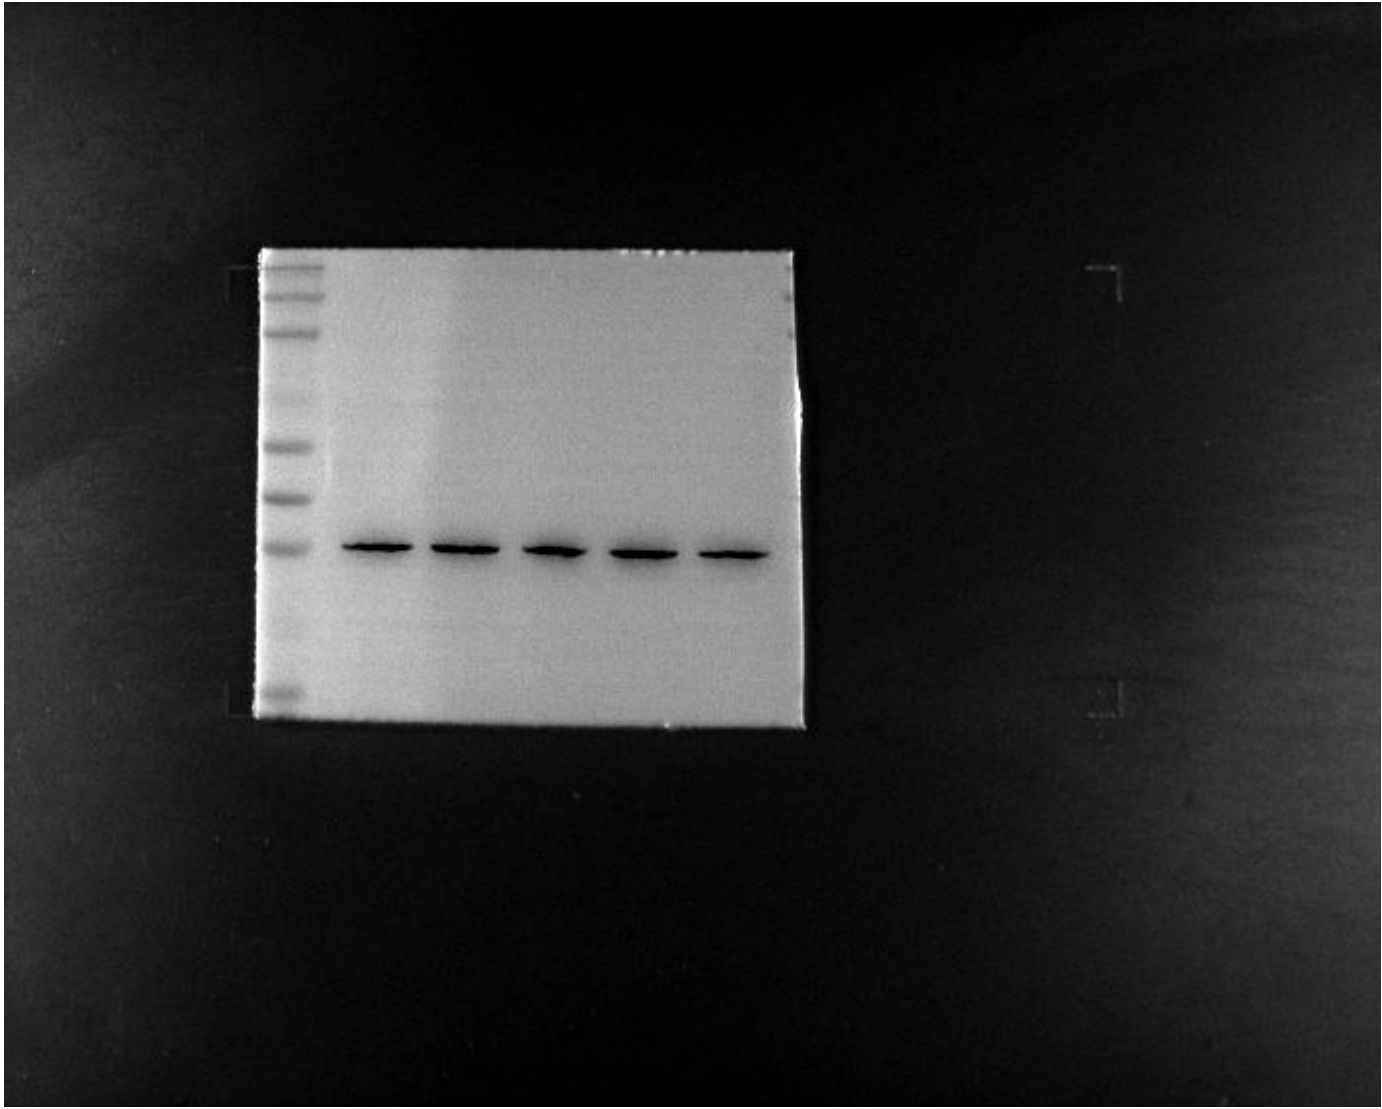

5637 VEGF-C

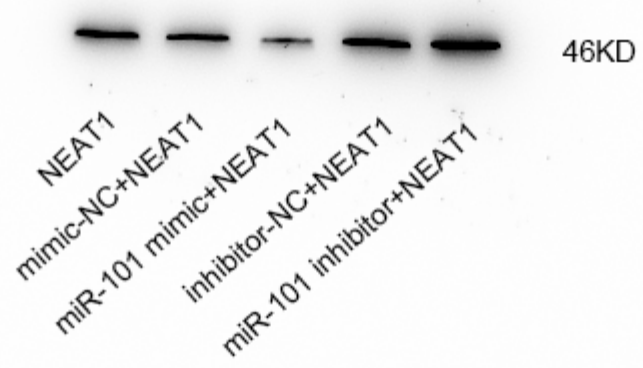

46KD

5637 GAPDH

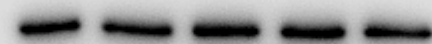

36KD

NEAT1  
mimic-NC+NEAT1  
miR-101 mimic+NEAT1  
inhibitor-NC+NEAT1  
miR-101 inhibitor+NEAT1

5637 VEGF-C

46KD

NEAT1  
mimic-NC+NEAT1  
miR-101 mimic+NEAT1  
inhibitor-NC+NEAT1  
miR-101 inhibitor+NEAT1

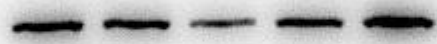

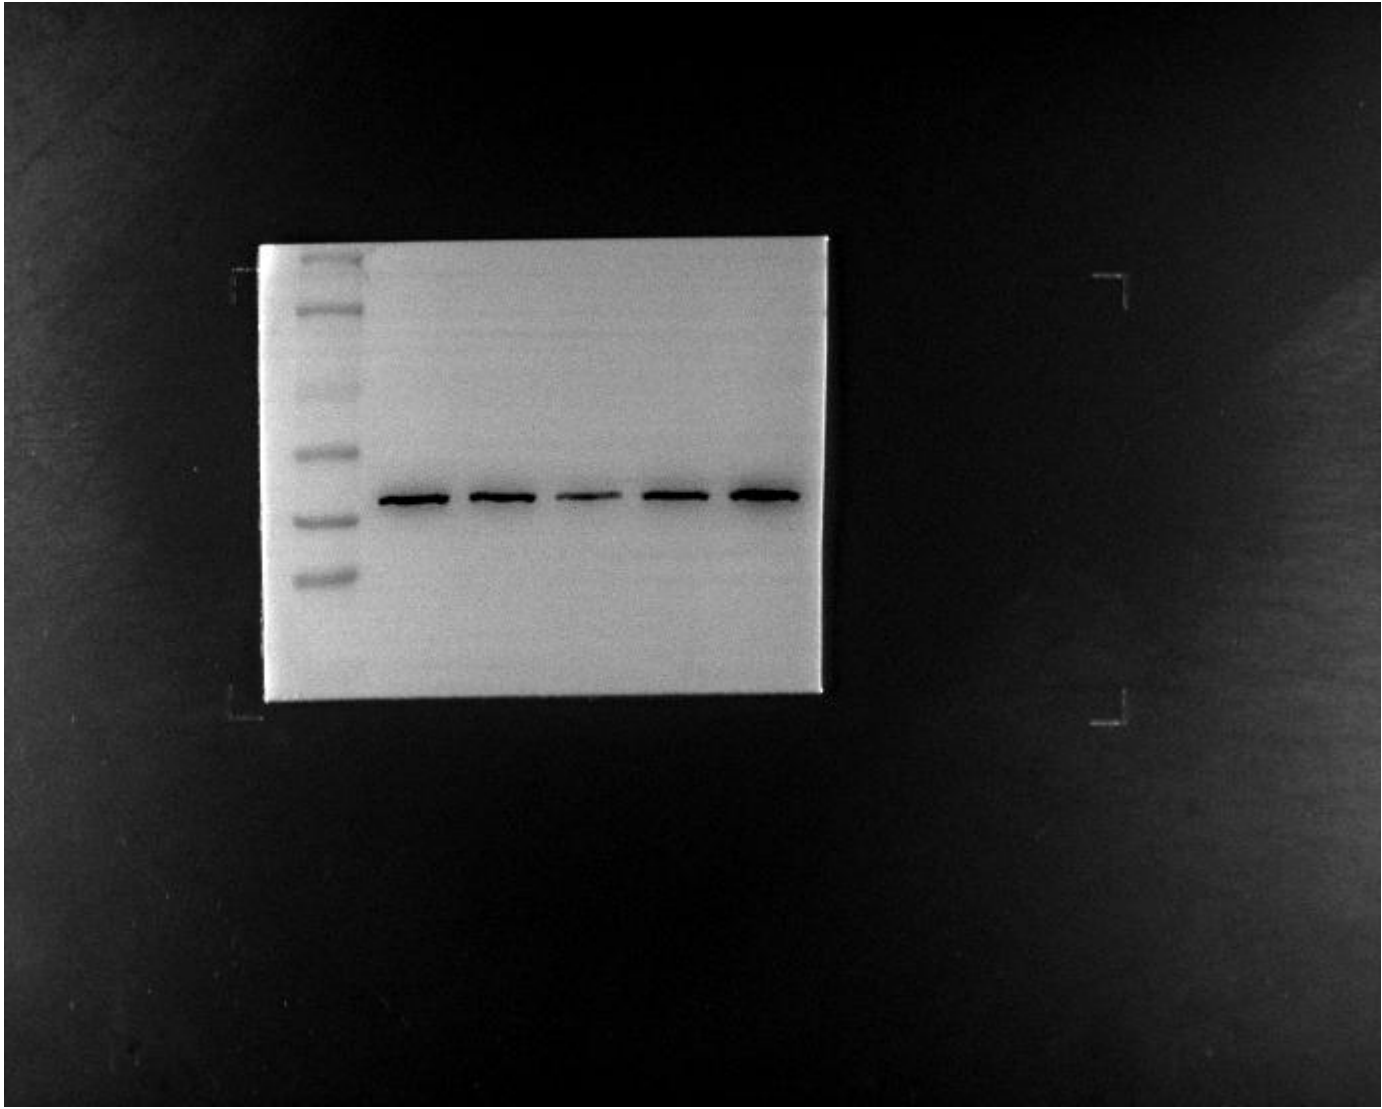

5637 GAPDH

36KD

NEAT1  
mimic-NC+NEAT1  
miR-101 mimic+NEAT1  
inhibitor-NC+NEAT1  
miR-101 inhibitor+NEAT1

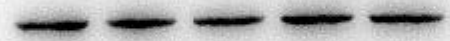

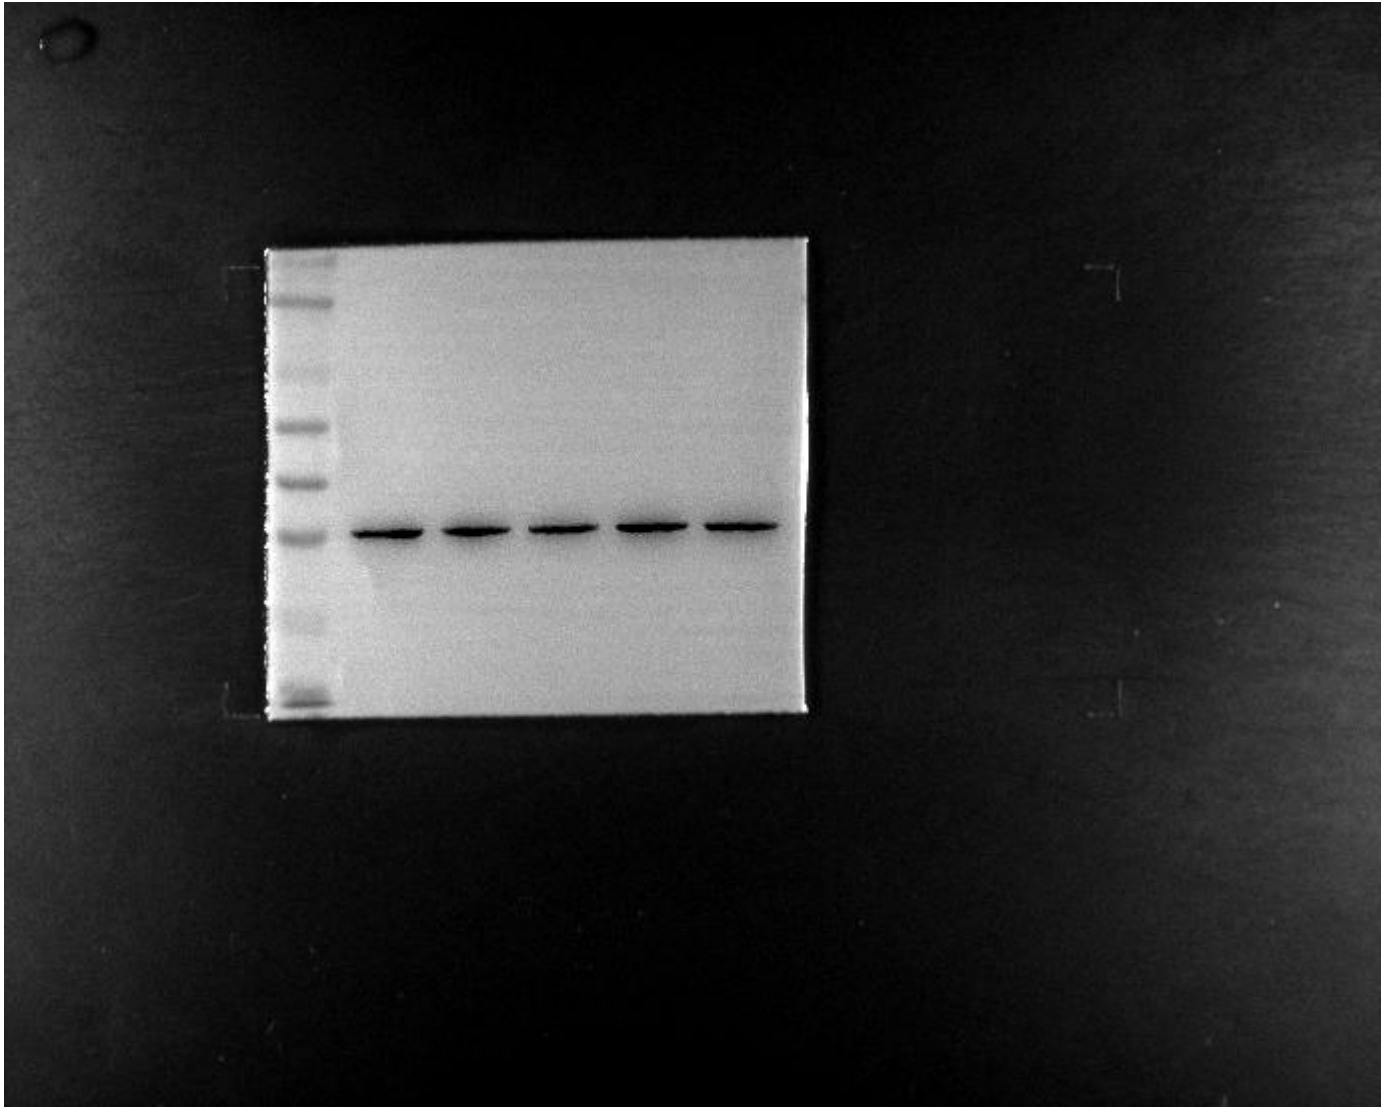



5637 VEGF-C

46KD

NEAT1  
mimic-NC+NEAT1  
miR-101 mimic+NEAT1  
inhibitor-NC+NEAT1  
miR-101 inhibitor+NEAT1

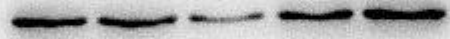

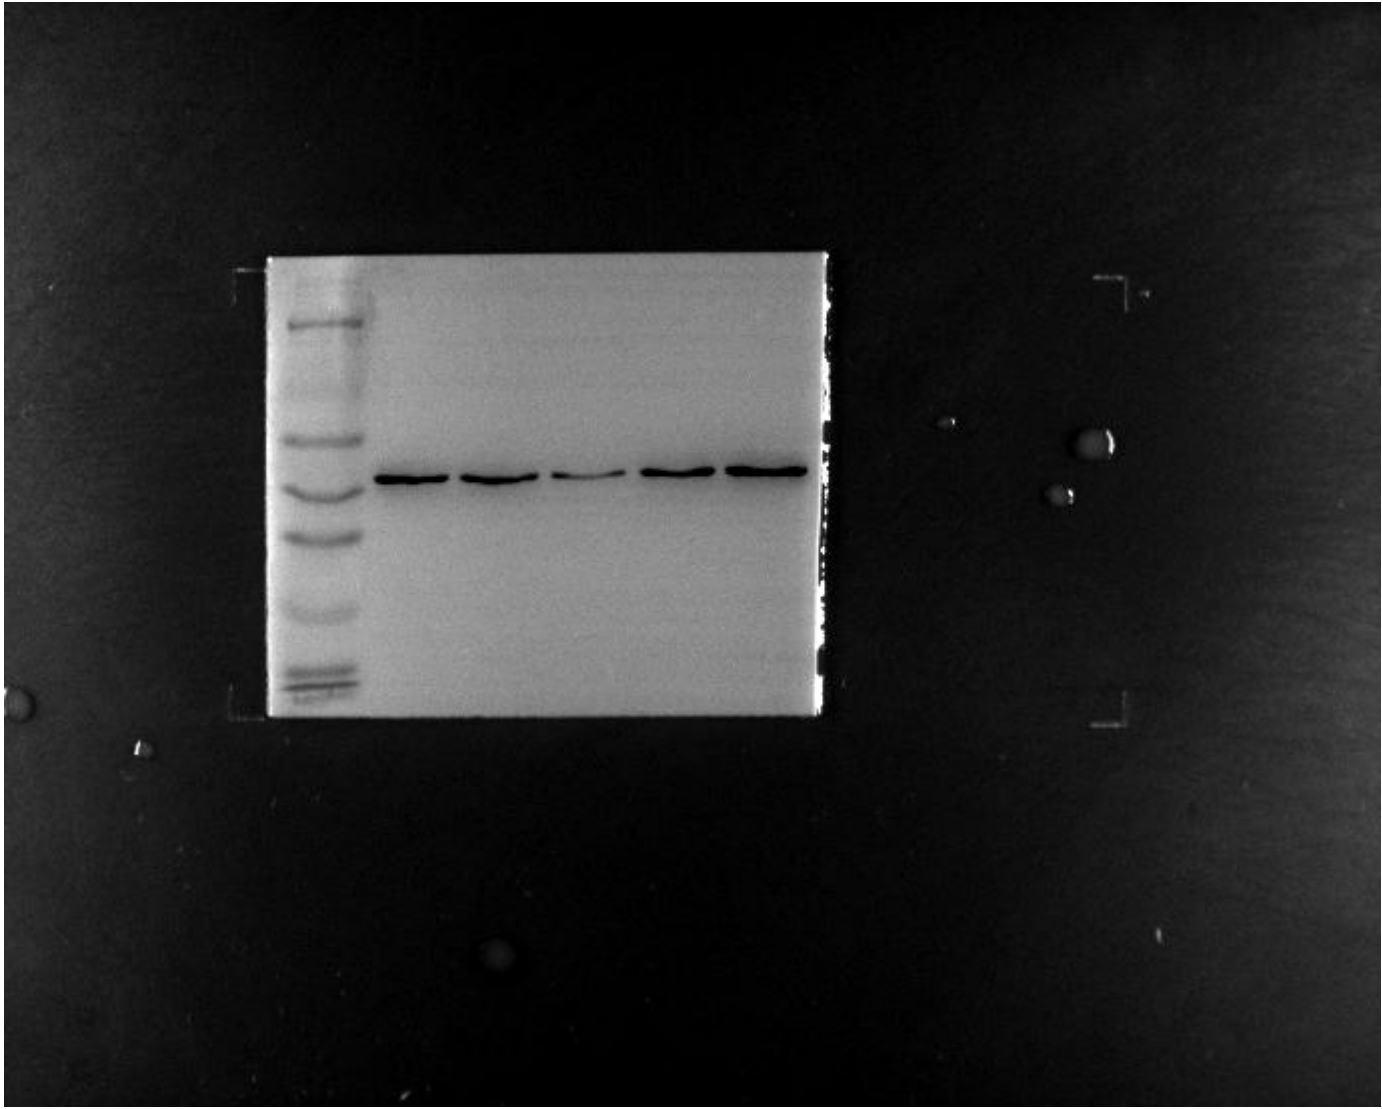

5637 GAPDH

NEAT1

mimic-NC+NEAT1

miR-101 mimic+NEAT1

inhibitor-NC+NEAT1

miR-101 inhibitor+NEAT1

36KD

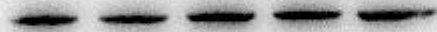

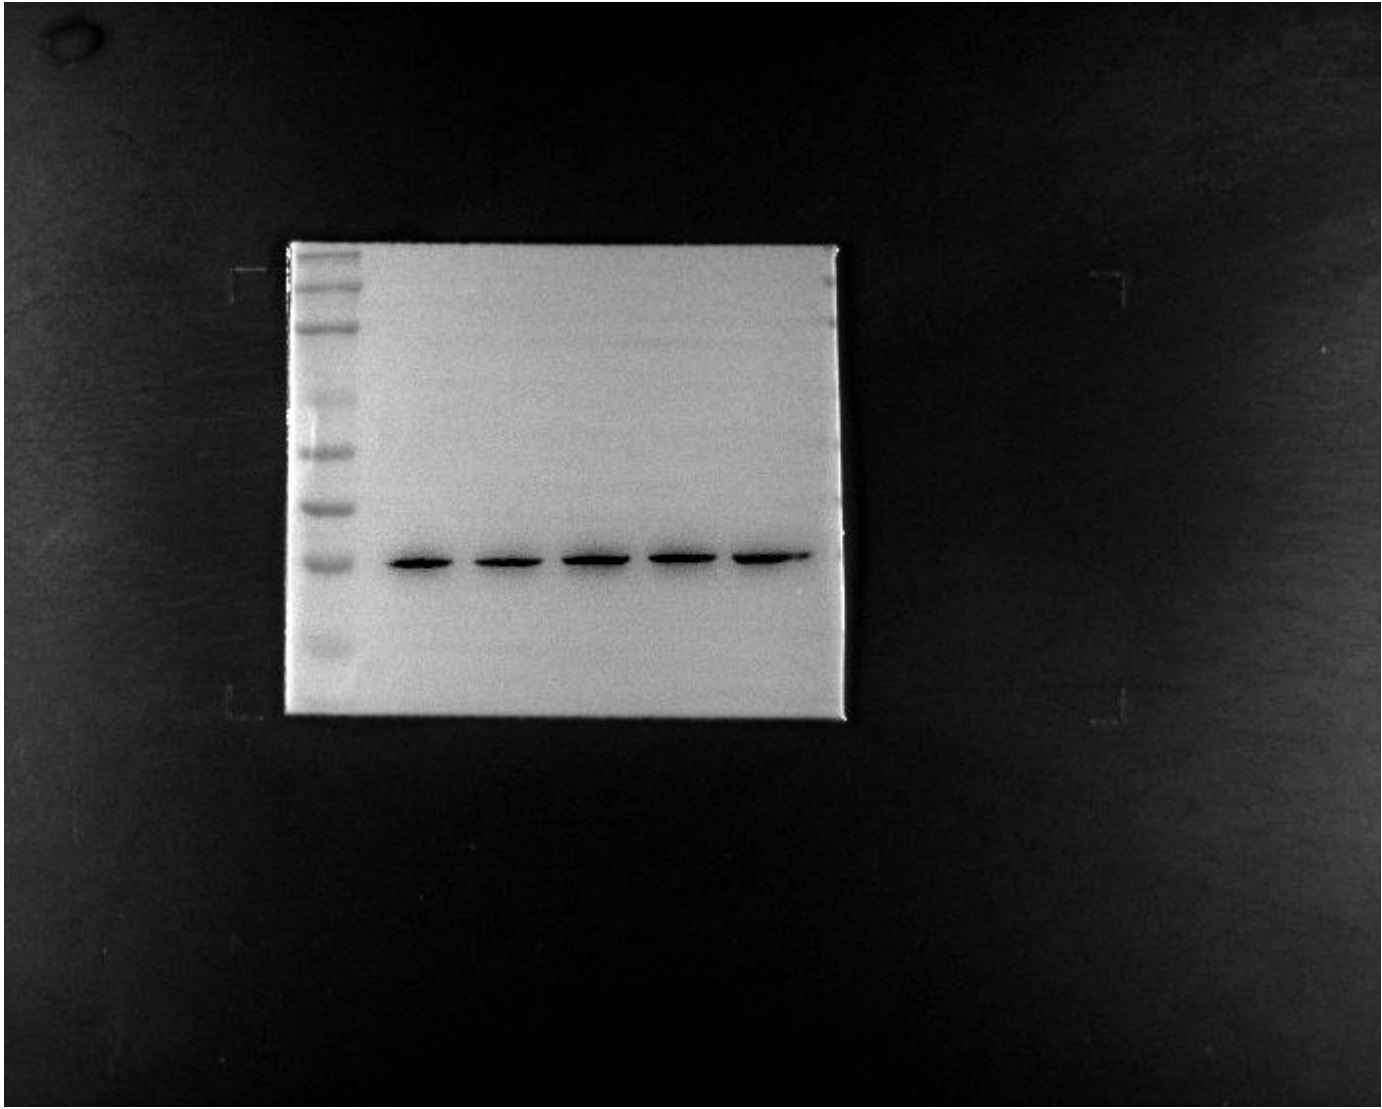

Supplement: 12894_2022_1151_MOESM2_ESM.pdf [file 12894_2022_1151_MOESM2_ESM.pdf]
