# Supplementary material for: NEAT1 promotes the malignant development of bladder cancer by regulating the miR-101/VEGF-C pathway in vitro and in vivo
Source: PubMed Central journal article supplement (PMC9700885; doi:10.1186/s12894-022-01151-z), 2022-11-25

Supplementary Fig S3

Original western blots for Figure 3E

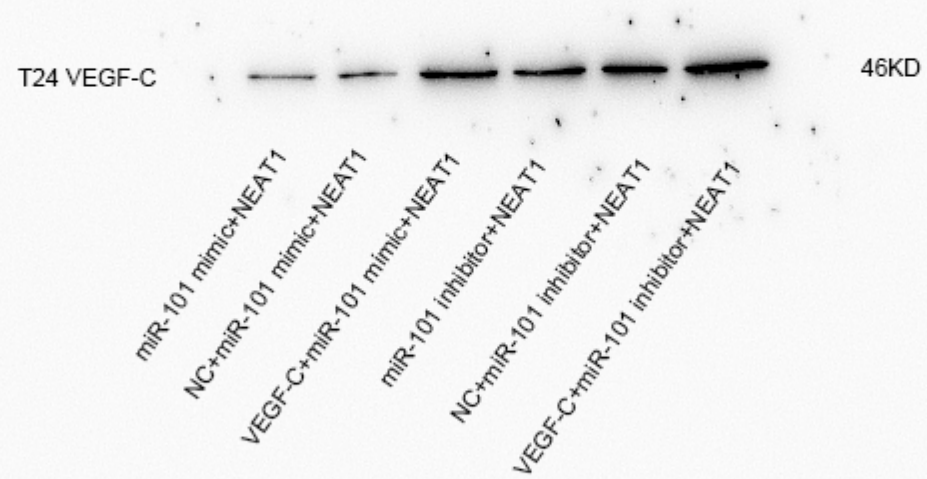

T24 GAPDH

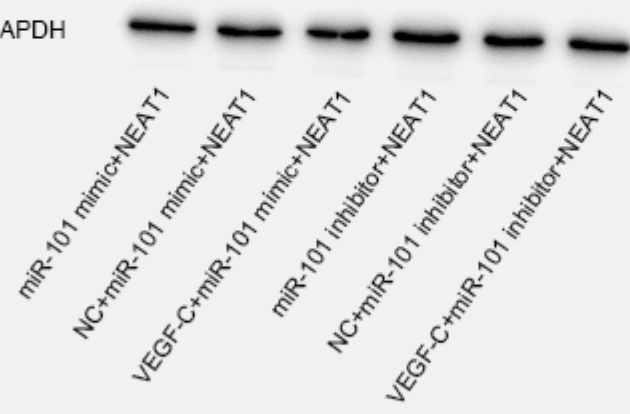

36KD

T24 VEGF-C

46KD

miR-101 mimic+NEAT1

NC+miR-101 mimic+NEAT1

VEGF-C+miR-101 mimic+NEAT1

miR-101 inhibitor+NEAT1

NC+miR-101 inhibitor+NEAT1

VEGF-C+miR-101 inhibitor+NEAT1

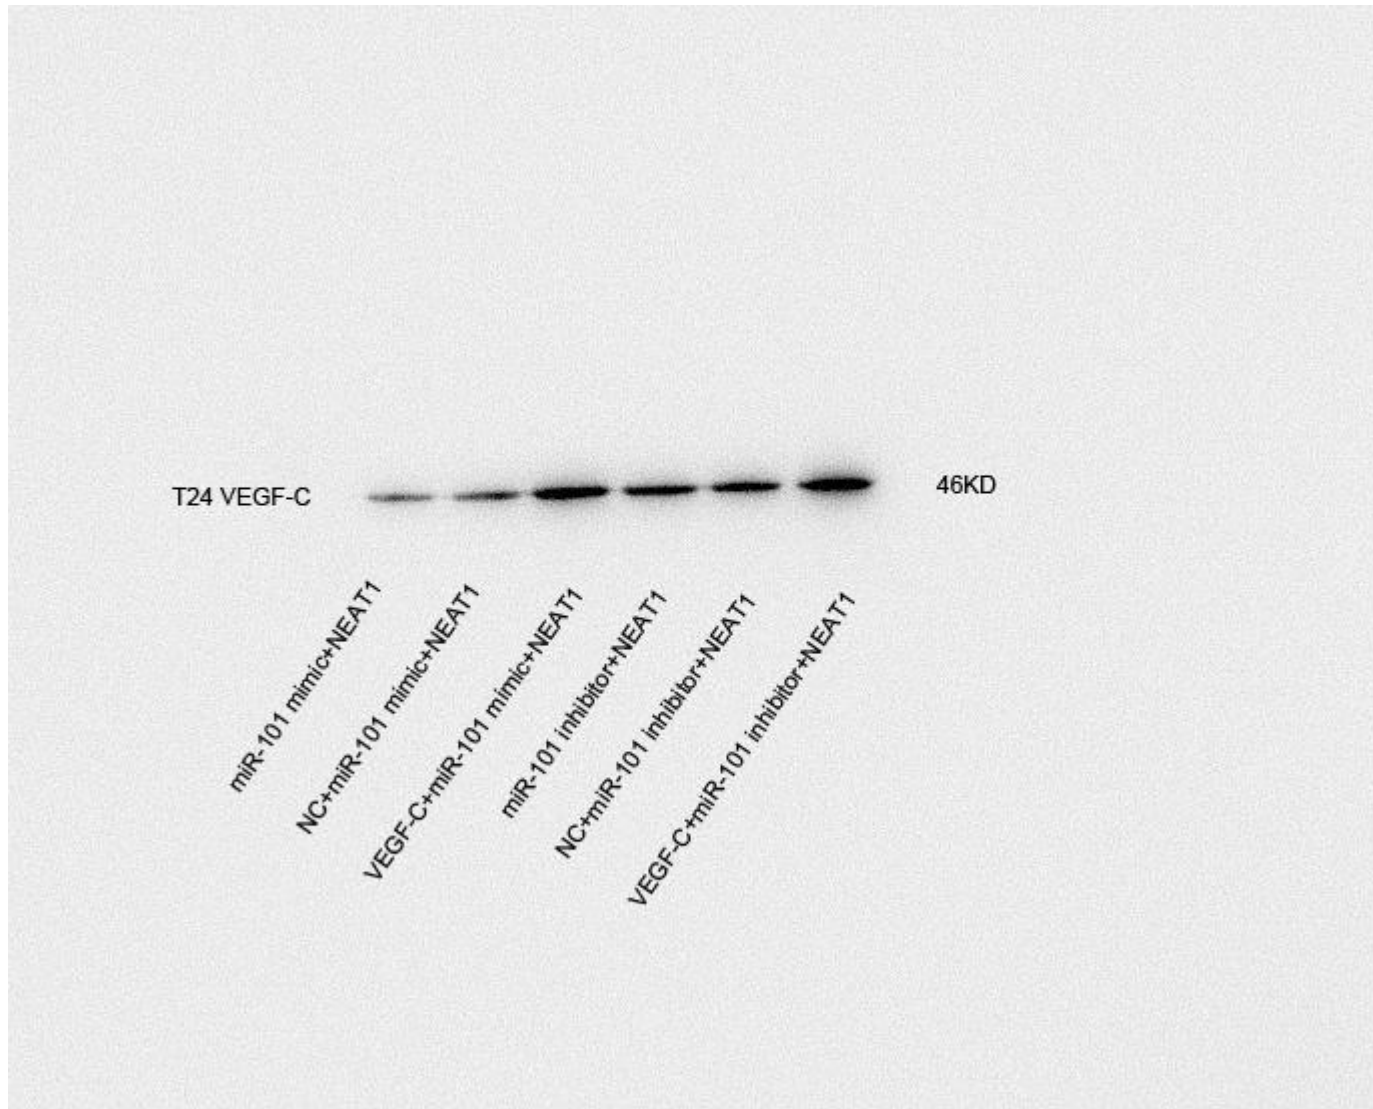

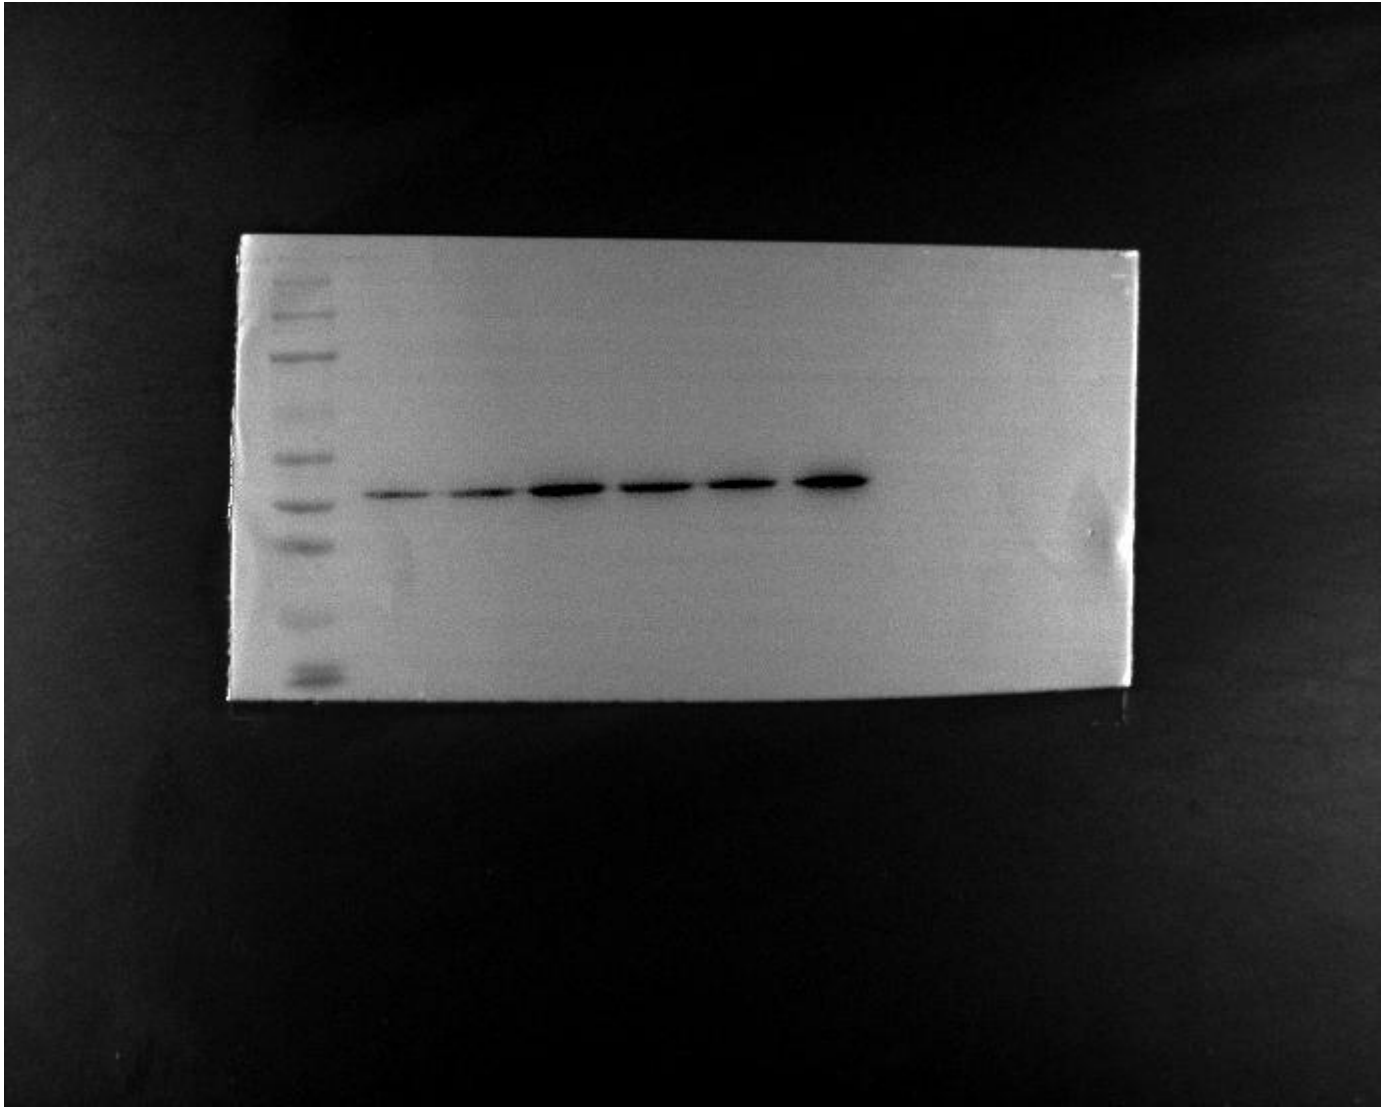

T24 GAPDH

36KD

miR-101 mimic+NEAT1  
NC+miR-101 mimic+NEAT1  
VEGF-C+miR-101 mimic+NEAT1  
miR-101 inhibitor+NEAT1  
NC+miR-101 inhibitor+NEAT1  
VEGF-C+miR-101 inhibitor+NEAT1

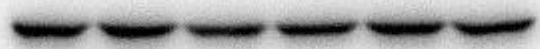

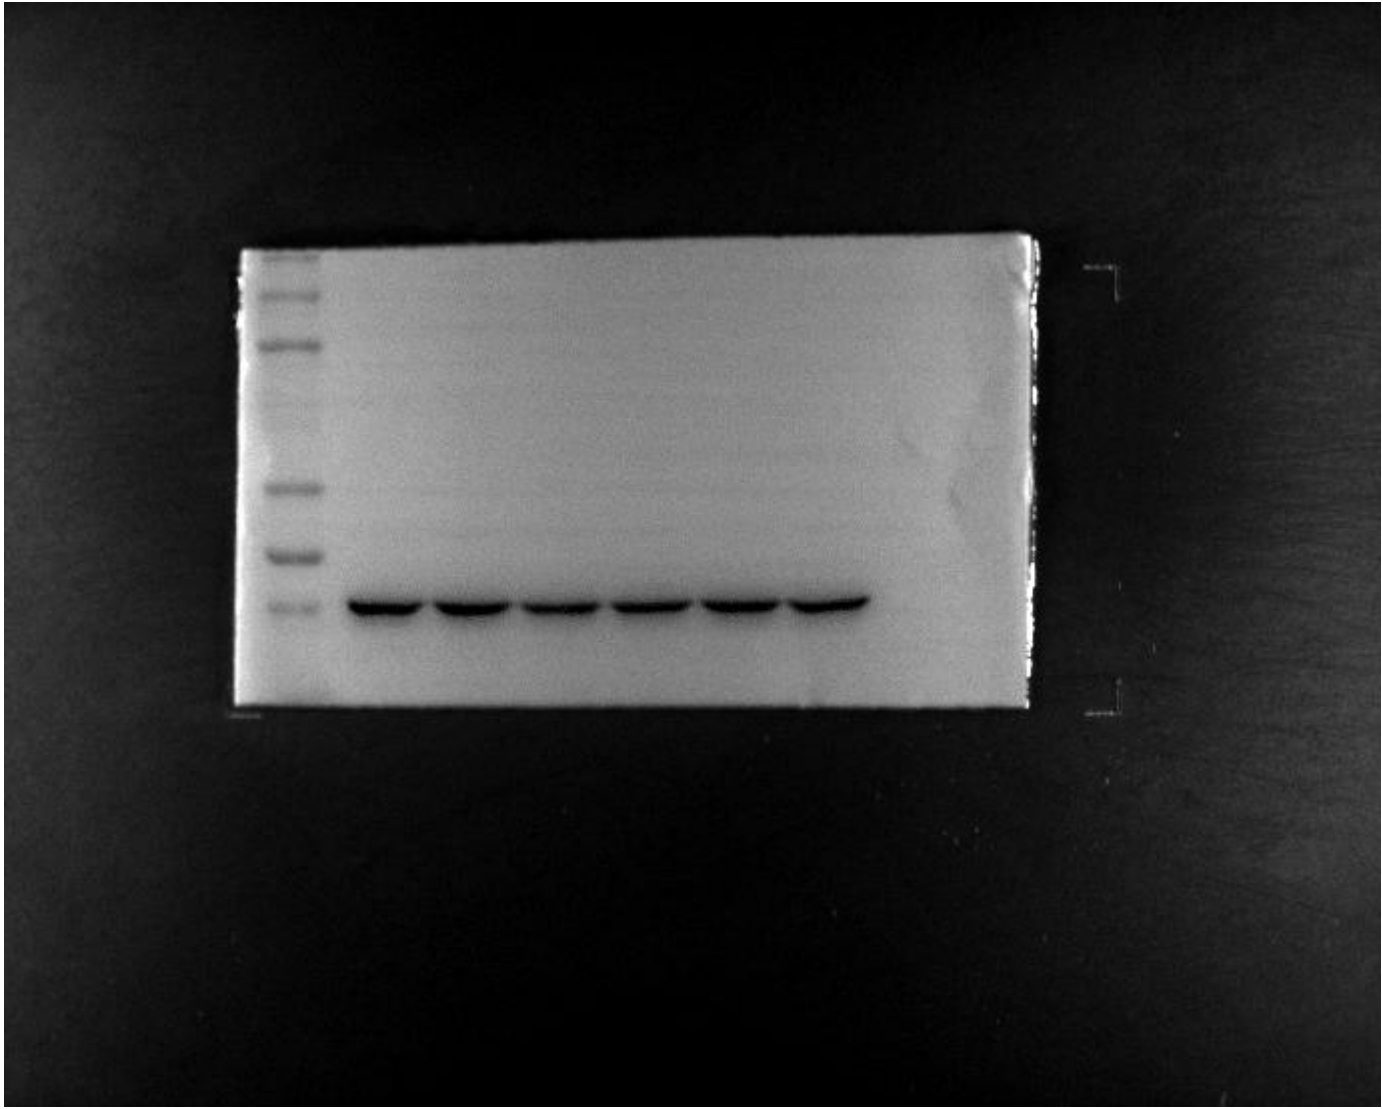

T24 VEGF-C

46KD

miR-101 mimic+NEAT1

NC+miR-101 mimic+NEAT1

VEGF-C+miR-101 mimic+NEAT1

miR-101 inhibitor+NEAT1

NC+miR-101 inhibitor+NEAT1

VEGF-C+miR-101 inhibitor+NEAT1

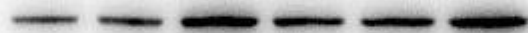

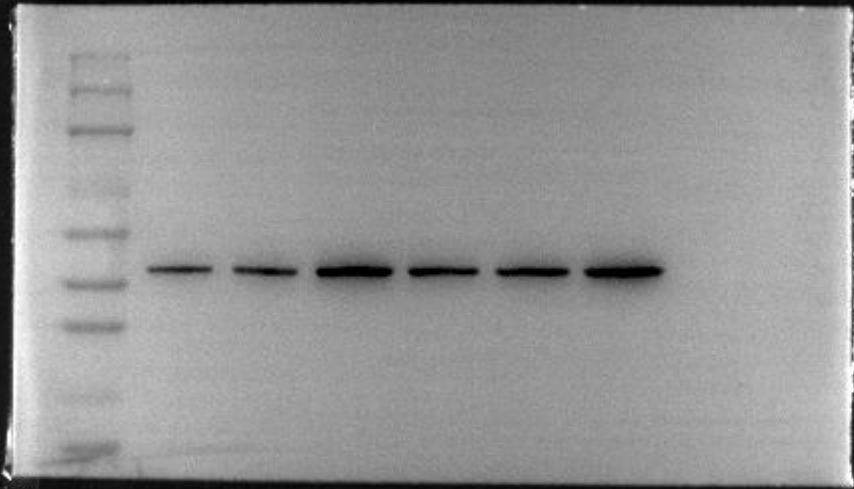



T24 GAPDH

36KD

miR-101 mimic+NEAT1

NC+miR-101 mimic+NEAT1

VEGF-C+miR-101 mimic+NEAT1

miR-101 inhibitor+NEAT1

NC+miR-101 inhibitor+NEAT1

VEGF-C+miR-101 inhibitor+NEAT1

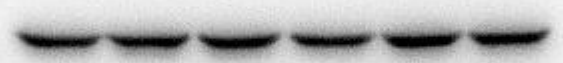

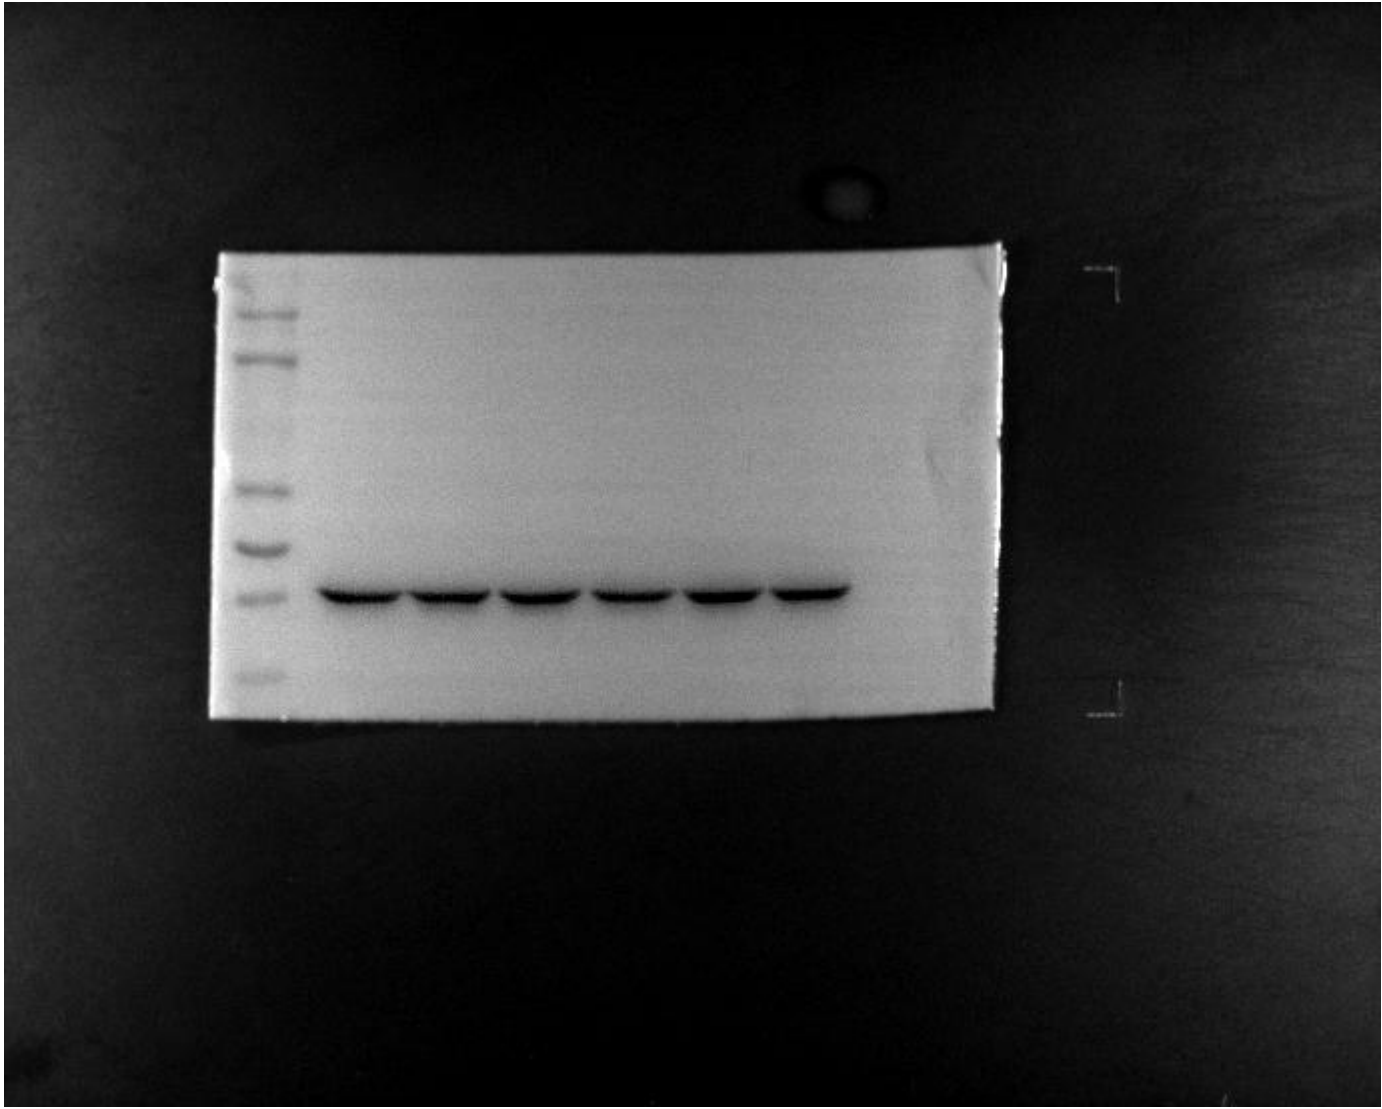

5637 VEGF-C 46KD

miR-101 mimic+NEAT1  
NC+miR-101 mimic+NEAT1  
VEGF-C+miR-101 mimic+NEAT1  
miR-101 inhibitor+NEAT1  
NC+miR-101 inhibitor+NEAT1  
VEGF-C+miR-101 inhibitor+NEAT1

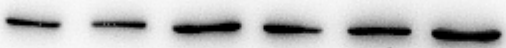

5637 GAPDH

miR-101 mimic+NEAT1

NC+miR-101 mimic+NEAT1

VEGF-C+miR-101 mimic+NEAT1

miR-101 inhibitor+NEAT1

NC+miR-101 inhibitor+NEAT1

VEGF-C+miR-101 inhibitor+NEAT1

36KD

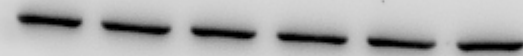

5637 VEGF-C

46KD

miR-101 mimic+NEAT1

NC+miR-101 mimic+NEAT1

VEGF-C+miR-101 mimic+NEAT1

miR-101 inhibitor+NEAT1

NC+miR-101 inhibitor+NEAT1

VEGF-C+miR-101 inhibitor+NEAT1

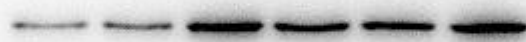

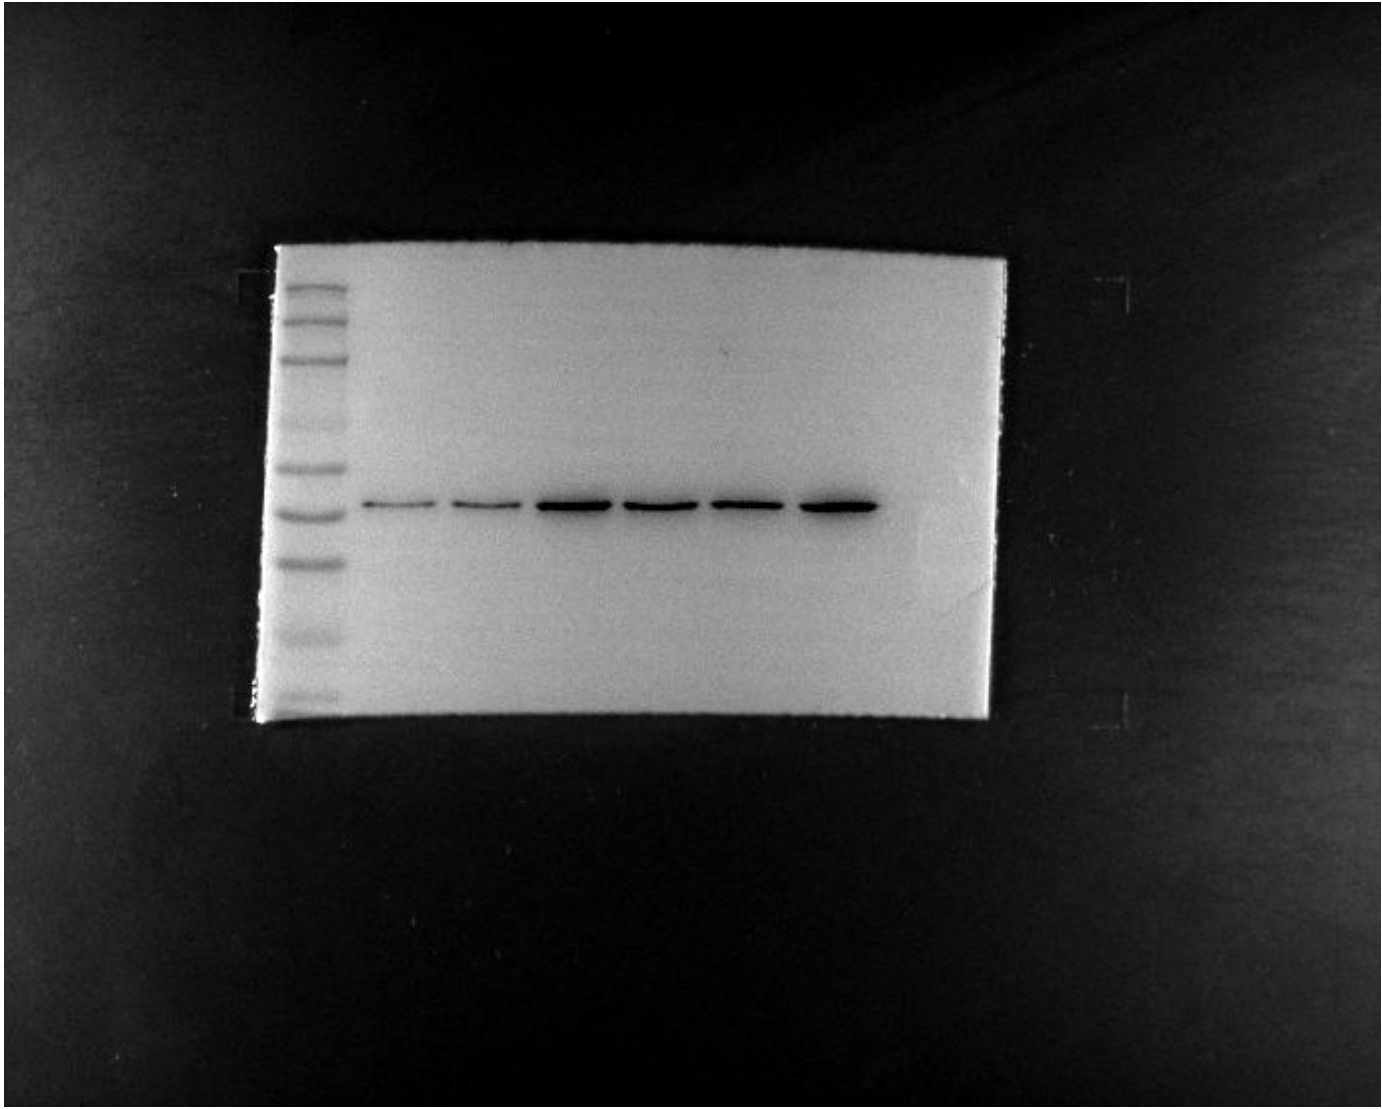

5637 GAPDH

36KD

miR-101 mimic+NEAT1

NC+miR-101 mimic+NEAT1

VEGF-C+miR-101 mimic+NEAT1

miR-101 inhibitor+NEAT1

NC+miR-101 inhibitor+NEAT1

VEGF-C+miR-101 inhibitor+NEAT1

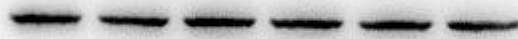

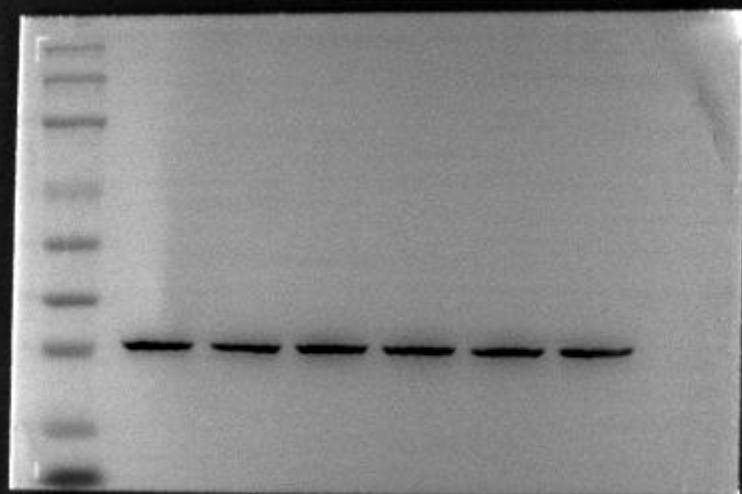



5637 VEGF-C

46KD

miR-101 mimic+NEAT1

NC+miR-101 mimic+NEAT1

VEGF-C+miR-101 mimic+NEAT1

miR-101 inhibitor+NEAT1

NC+miR-101 inhibitor+NEAT1

VEGF-C+miR-101 inhibitor+NEAT1

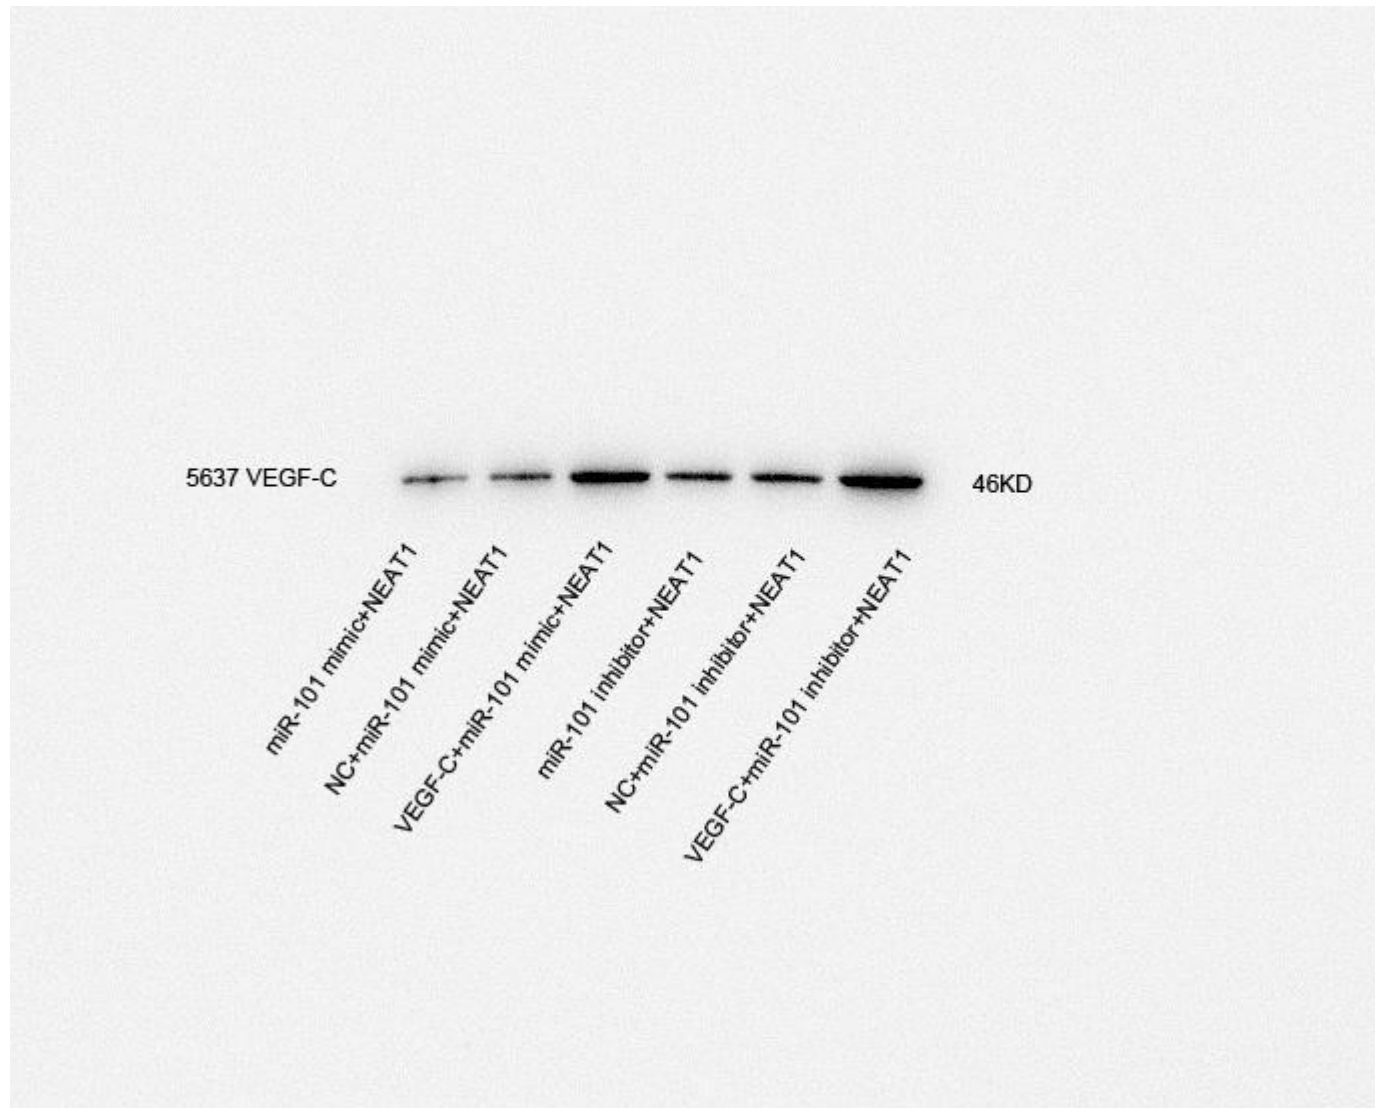

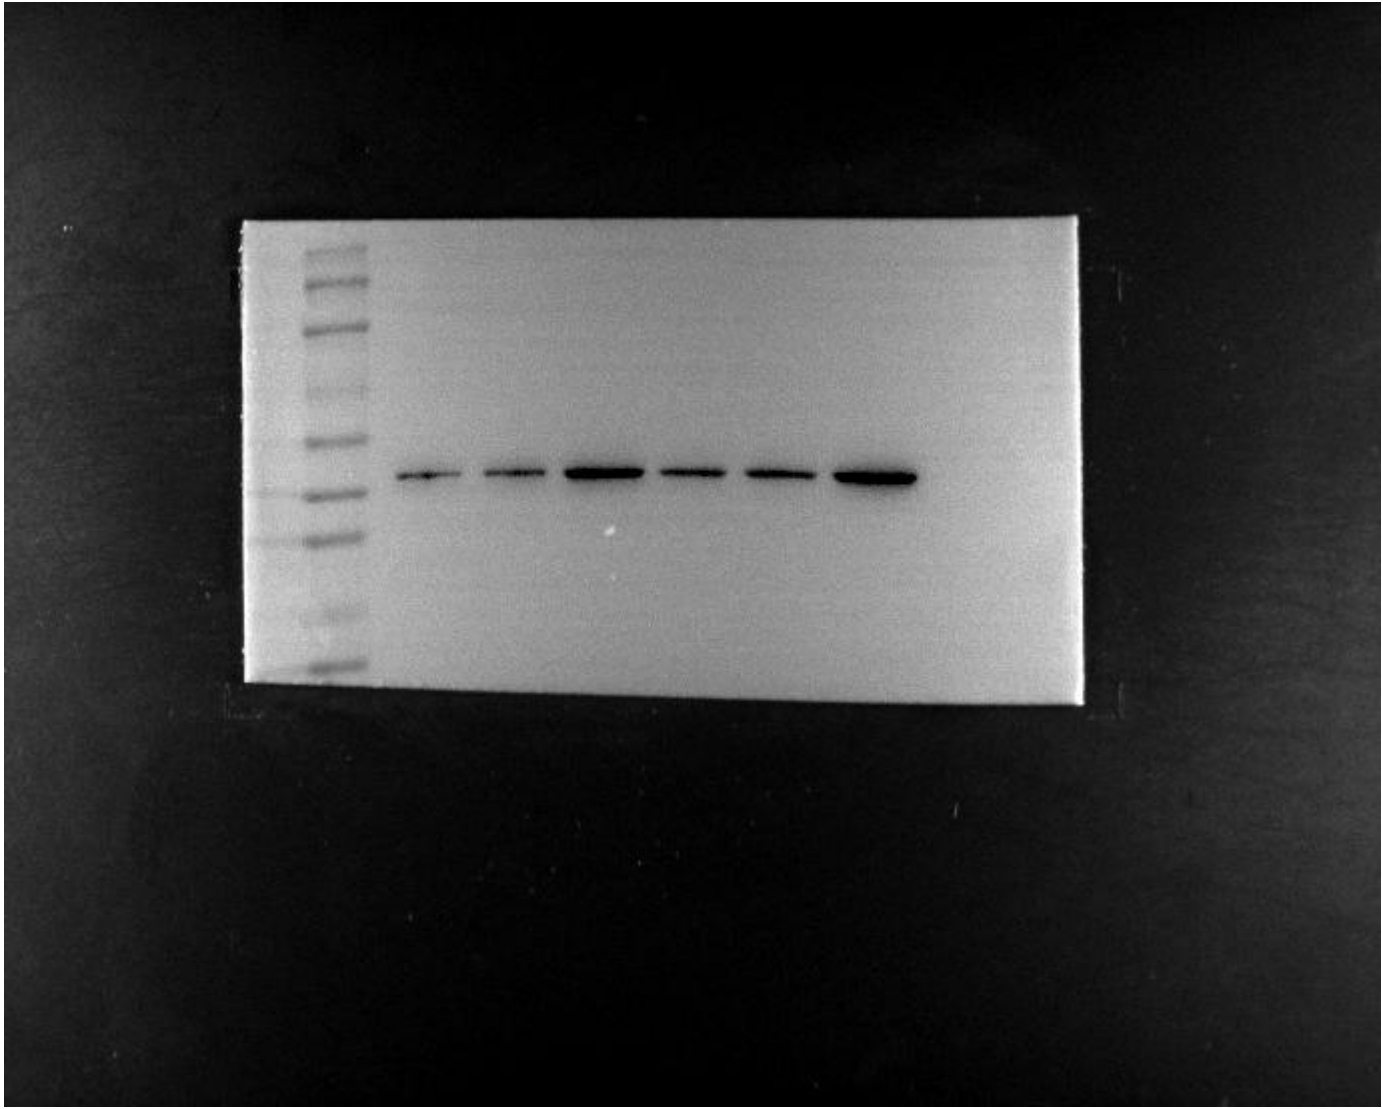

5637 GAPDH

36KD

miR-101 mimic+NEAT1  
NC+miR-101 mimic+NEAT1  
VEGF-C+miR-101 mimic+NEAT1  
miR-101 inhibitor+NEAT1  
NC+miR-101 inhibitor+NEAT1  
VEGF-C+miR-101 inhibitor+NEAT1

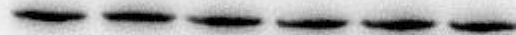

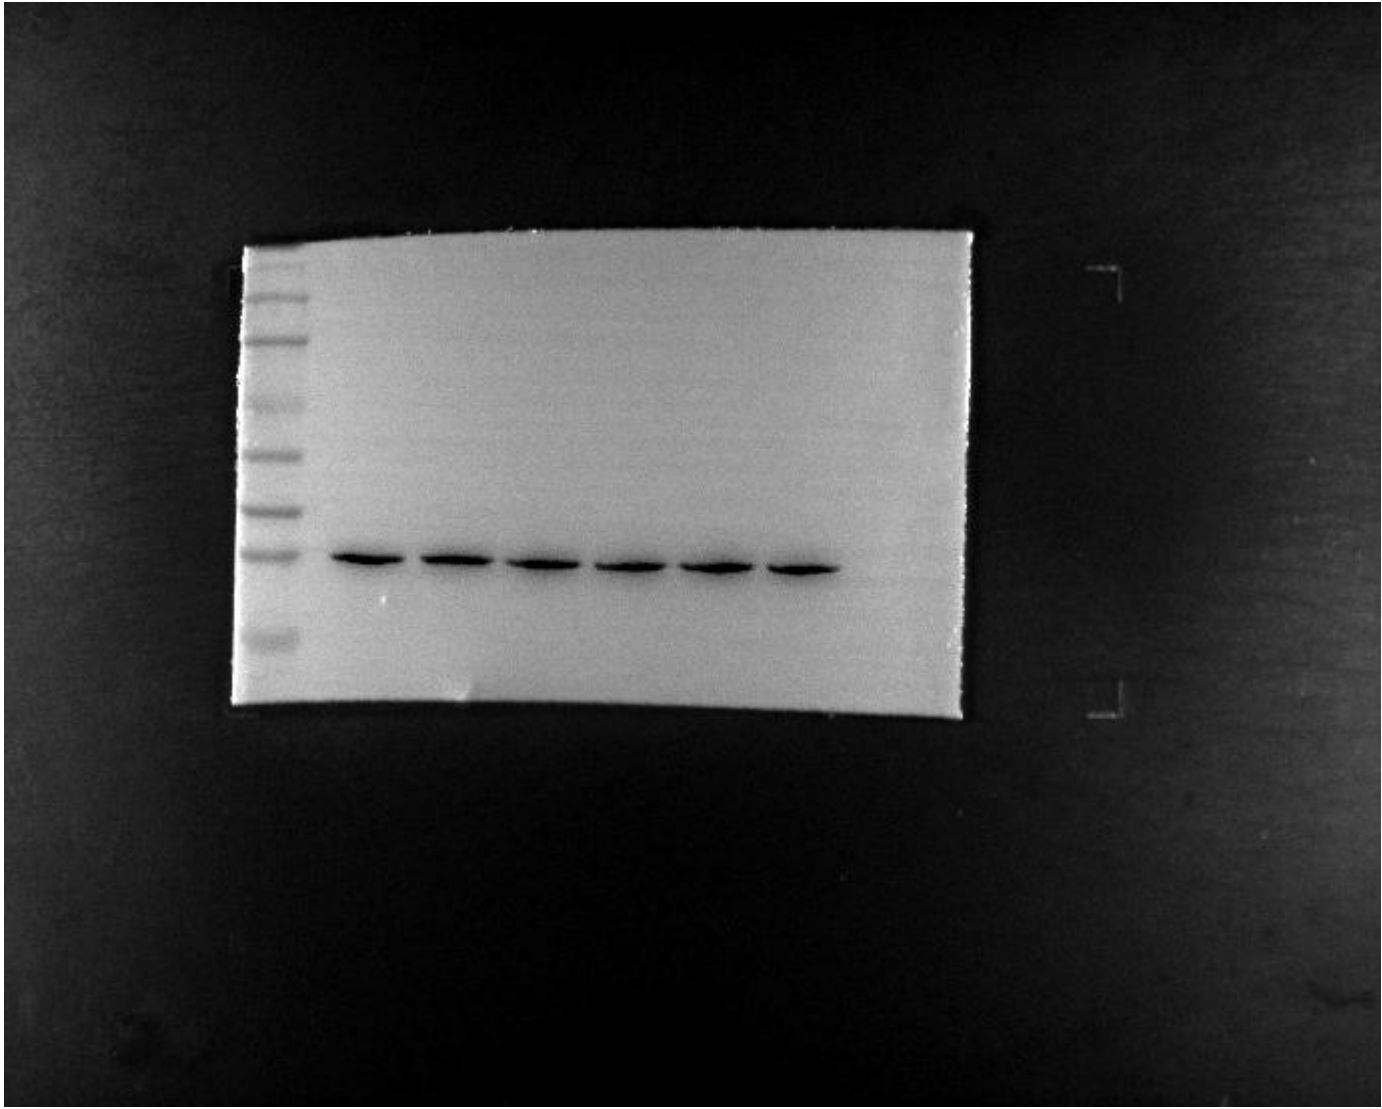

Supplement: 12894_2022_1151_MOESM3_ESM.pdf [file 12894_2022_1151_MOESM3_ESM.pdf]
