# Supplementary material for: NEAT1 promotes the malignant development of bladder cancer by regulating the miR-101/VEGF-C pathway in vitro and in vivo
Source: PubMed Central journal article supplement (PMC9700885; doi:10.1186/s12894-022-01151-z), 2022-11-25

Supplementary Fig S4

Original western blots for Figure 5C

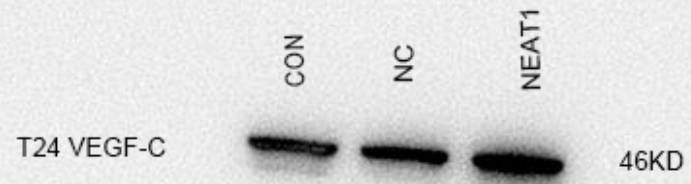

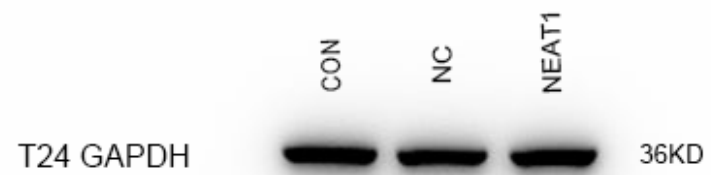

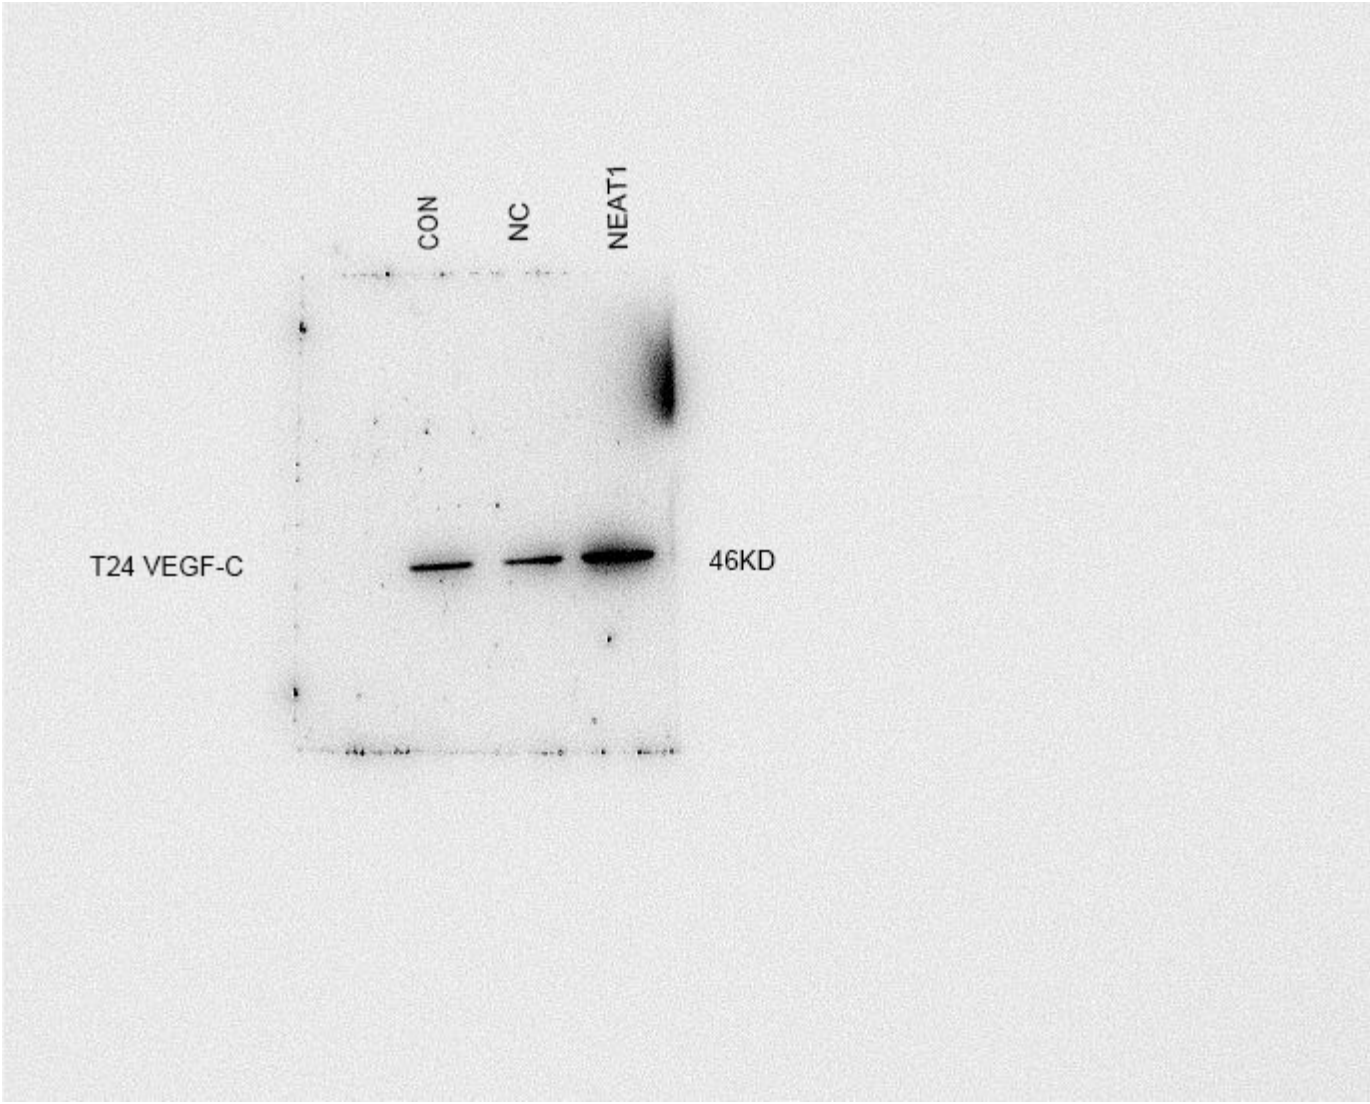

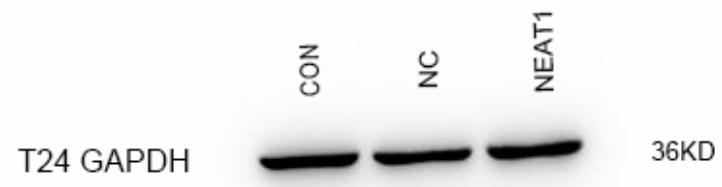

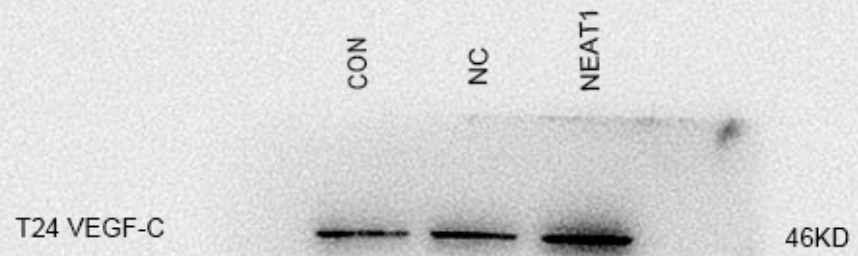

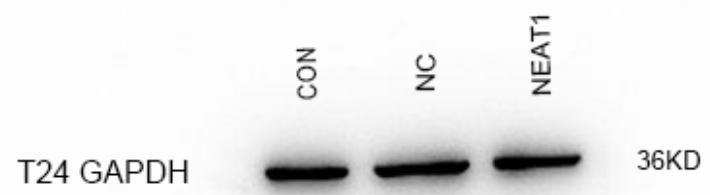

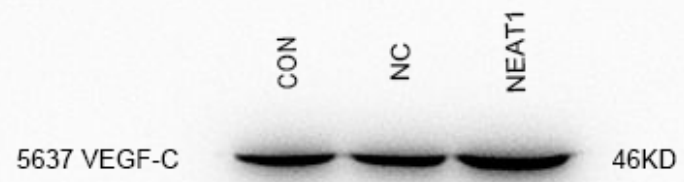

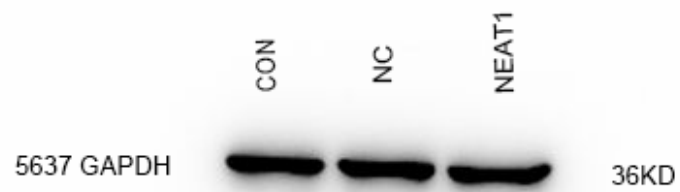



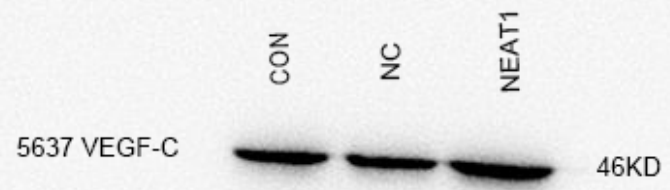

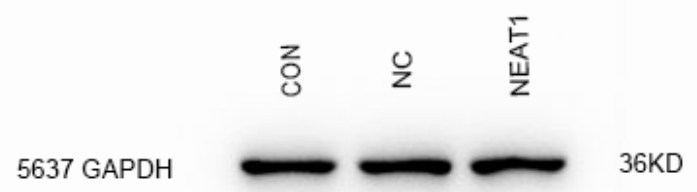

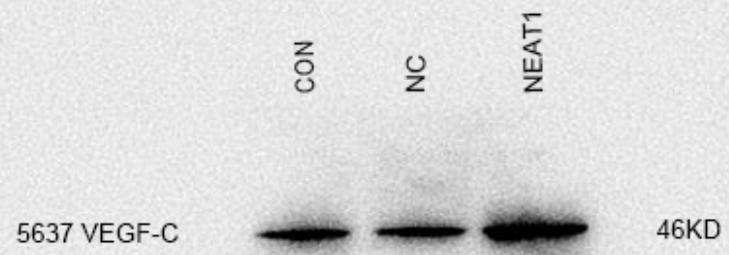

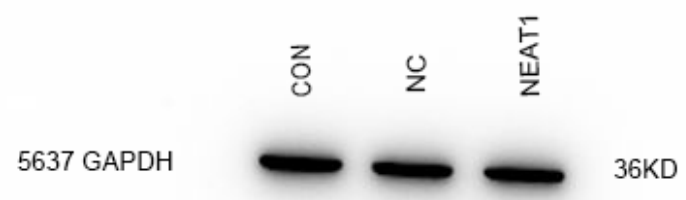

Supplement: 12894_2022_1151_MOESM4_ESM.pdf [file 12894_2022_1151_MOESM4_ESM.pdf]
